# Supplementary material for: Challenges in Simulating Ozone Depletion Events in the Arctic Boundary Layer: A Case Study Using ECHAM/MESSy for Spring 2019/20
Source: Copernicus journal article supplement (doi:10.5194/egusphere-2025-3181), 2025-07-08
Supplement: Supplementary file 1 [file meccanism.pdf › supplement/meccanism.pdf]

# The Chemical Mechanism of MECCA

KPP version: 2.2.3\_rs3

MECCA version: 4.4.0.m1

Date: July 3, 2025

Batch file: CCM12-base-01.bat

Integrator: rosenbrock\_mz

Gas equation file: gas.eqn

Replacement file: mim1-CCM12-base-01

Selected reactions:

“(((Tr && (G || Het) && !I) || St) && !Hg)”

Number of aerosol phases: 0

Number of species in selected mechanism:

Gas phase: 137

Aqueous phase: 0

All species: 137

Number of reactions in selected mechanism:

Gas phase (Gnn): 261

Aqueous phase (Annn): 0

Henry (Hnnn): 0

Photolysis (Jnnn): 80

Aqueous phase photolysis (PHnnn): 0

Heterogeneous (HETnnn): 12

Equilibria (EQnn): 0

Isotope exchange (IEXnnn): 0

Tagging equations (TAGnnn): 0

Dummy (Dnn): 0

All equations: 353

Table S1: Gas phase reactions

| #      | labels   | reaction                                | rate coefficient                                                | reference                 |
|--------|----------|-----------------------------------------|-----------------------------------------------------------------|---------------------------|
| G1000  | UpStTrG  | $O_2 + O(^1D) \rightarrow O(^3P) + O_2$ | $3.3E-11 \cdot \exp(55./temp)$                                  | Burkholder et al. (2015)  |
| G1001  | UpStTrG  | $O_2 + O(^3P) \rightarrow O_3$          | $6.0E-34 \cdot ((temp/300.)^{**(-2.4)})$<br>$\cdot c_{air}$     | Burkholder et al. (2015)  |
| G1002a | UpStG    | $O_3 + O(^1D) \rightarrow 2 O_2$        | $1.2E-10$                                                       | Burkholder et al. (2015)* |
| G1003  | UpStG    | $O_3 + O(^3P) \rightarrow 2 O_2$        | $8.0E-12 \cdot \exp(-2060./temp)$                               | Burkholder et al. (2015)  |
| G2100  | UpStTrG  | $H + O_2 \rightarrow HO_2$              | $k_{3rd}(temp, c_{air}, 4.4E-32, 1.3,$<br>$7.5E-11, -0.2, 0.6)$ | Burkholder et al. (2015)  |
| G2101  | UpStG    | $H + O_3 \rightarrow OH + O_2$          | $1.4E-10 \cdot \exp(-470./temp)$                                | Burkholder et al. (2015)  |
| G2102  | UpStG    | $H_2 + O(^1D) \rightarrow H + OH$       | $1.2E-10$                                                       | Burkholder et al. (2015)  |
| G2103  | UpStG    | $OH + O(^3P) \rightarrow H + O_2$       | $1.8E-11 \cdot \exp(180./temp)$                                 | Burkholder et al. (2015)  |
| G2104  | UpStTrG  | $OH + O_3 \rightarrow HO_2 + O_2$       | $1.7E-12 \cdot \exp(-940./temp)$                                | Burkholder et al. (2015)  |
| G2105  | UpStTrG  | $OH + H_2 \rightarrow H_2O + H$         | $2.8E-12 \cdot \exp(-1800./temp)$                               | Burkholder et al. (2015)  |
| G2106  | UpStG    | $HO_2 + O(^3P) \rightarrow OH + O_2$    | $3.E-11 \cdot \exp(200./temp)$                                  | Burkholder et al. (2015)  |
| G2107  | UpStTrG  | $HO_2 + O_3 \rightarrow OH + 2 O_2$     | $1.E-14 \cdot \exp(-490./temp)$                                 | Burkholder et al. (2015)  |
| G2108a | UpStG    | $HO_2 + H \rightarrow 2 OH$             | $7.2E-11$                                                       | Burkholder et al. (2015)  |
| G2108b | UpStG    | $HO_2 + H \rightarrow H_2 + O_2$        | $6.9E-12$                                                       | Burkholder et al. (2015)  |
| G2108c | UpStG    | $HO_2 + H \rightarrow O(^3P) + H_2O$    | $1.6E-12$                                                       | Burkholder et al. (2015)  |
| G2109  | UpStTrG  | $HO_2 + OH \rightarrow H_2O + O_2$      | $4.8E-11 \cdot \exp(250./temp)$                                 | Burkholder et al. (2015)  |
| G2110  | UpStTrG  | $HO_2 + HO_2 \rightarrow H_2O_2 + O_2$  | $k_{H02\_H02}$                                                  | Burkholder et al. (2015)* |
| G2111  | UpStTrG  | $H_2O + O(^1D) \rightarrow 2 OH$        | $1.63E-10 \cdot \exp(60./temp)$                                 | Burkholder et al. (2015)  |
| G2112  | UpStTrG  | $H_2O_2 + OH \rightarrow H_2O + HO_2$   | $1.8E-12$                                                       | Burkholder et al. (2015)  |
| G3100  | UpStGN   | $N + O_2 \rightarrow NO + O(^3P)$       | $1.5E-11 \cdot \exp(-3600./temp)$                               | Burkholder et al. (2015)  |
| G3101  | UpStTrGN | $N_2 + O(^1D) \rightarrow O(^3P) + N_2$ | $2.15E-11 \cdot \exp(110./temp)$                                | Burkholder et al. (2015)  |
| G3102a | UpStGN   | $N_2O + O(^1D) \rightarrow 2 NO$        | $7.259E-11 \cdot \exp(20./temp)$                                | Burkholder et al. (2015)  |
| G3102b | StGN     | $N_2O + O(^1D) \rightarrow N_2 + O_2$   | $4.641E-11 \cdot \exp(20./temp)$                                | Burkholder et al. (2015)  |
| G3103  | UpStTrGN | $NO + O_3 \rightarrow NO_2 + O_2$       | $3.0E-12 \cdot \exp(-1500./temp)$                               | Burkholder et al. (2015)  |
| G3104  | UpStGN   | $NO + N \rightarrow O(^3P) + N_2$       | $2.1E-11 \cdot \exp(100./temp)$                                 | Burkholder et al. (2015)  |
| G3105  | UpStGN   | $NO_2 + O(^3P) \rightarrow NO + O_2$    | $5.1E-12 \cdot \exp(210./temp)$                                 | Burkholder et al. (2015)  |
| G3106  | StTrGN   | $NO_2 + O_3 \rightarrow NO_3 + O_2$     | $1.2E-13 \cdot \exp(-2450./temp)$                               | Burkholder et al. (2015)  |
| G3107  | UpStGN   | $NO_2 + N \rightarrow N_2O + O(^3P)$    | $5.8E-12 \cdot \exp(220./temp)$                                 | Burkholder et al. (2015)  |
| G3108  | StTrGN   | $NO_3 + NO \rightarrow 2 NO_2$          | $1.5E-11 \cdot \exp(170./temp)$                                 | Burkholder et al. (2015)  |
| G3109  | UpStTrGN | $NO_3 + NO_2 \rightarrow N_2O_5$        | $k_{N03\_N02}$                                                  | Burkholder et al. (2015)* |
| G3110  | StTrGN   | $N_2O_5 \rightarrow NO_2 + NO_3$        | $k_{N03\_N02}/(5.8E-27 \cdot \exp(10840./temp))$                | Burkholder et al. (2015)* |

Table S1: Gas phase reactions (... continued)

| #     | labels   | reaction                                                                                                                                    | rate coefficient                                                                          | reference                 |
|-------|----------|---------------------------------------------------------------------------------------------------------------------------------------------|-------------------------------------------------------------------------------------------|---------------------------|
| G3200 | TrGN     | $\text{NO} + \text{OH} \rightarrow \text{HONO}$                                                                                             | $k_{\text{3rd}}(\text{temp}, \text{cair}, 7.0\text{E-}31, 2.6, 3.6\text{E-}11, 0.1, 0.6)$ | Burkholder et al. (2015)  |
| G3201 | UpStTrGN | $\text{NO} + \text{HO}_2 \rightarrow \text{NO}_2 + \text{OH}$                                                                               | $3.3\text{E-}12 * \text{EXP}(270./\text{temp})$                                           | Burkholder et al. (2015)  |
| G3202 | UpStTrGN | $\text{NO}_2 + \text{OH} \rightarrow \text{HNO}_3$                                                                                          | $k_{\text{3rd}}(\text{temp}, \text{cair}, 1.8\text{E-}30, 3.0, 2.8\text{E-}11, 0., 0.6)$  | Burkholder et al. (2015)  |
| G3203 | StTrGN   | $\text{NO}_2 + \text{HO}_2 \rightarrow \text{HNO}_4$                                                                                        | $k_{\text{N02\_H02}}$                                                                     | Burkholder et al. (2015)* |
| G3204 | TrGN     | $\text{NO}_3 + \text{HO}_2 \rightarrow \text{NO}_2 + \text{OH} + \text{O}_2$                                                                | $3.5\text{E-}12$                                                                          | Burkholder et al. (2015)  |
| G3205 | TrGN     | $\text{HONO} + \text{OH} \rightarrow \text{NO}_2 + \text{H}_2\text{O}$                                                                      | $1.8\text{E-}11 * \text{EXP}(-390./\text{temp})$                                          | Burkholder et al. (2015)  |
| G3206 | StTrGN   | $\text{HNO}_3 + \text{OH} \rightarrow \text{H}_2\text{O} + \text{NO}_3$                                                                     | $k_{\text{HNO3\_OH}}$                                                                     | Dulitz et al. (2018)*     |
| G3207 | StTrGN   | $\text{HNO}_4 \rightarrow \text{NO}_2 + \text{HO}_2$                                                                                        | $k_{\text{N02\_H02}} / (2.1\text{E-}27 * \text{EXP}(10900./\text{temp}))$                 | Burkholder et al. (2015)* |
| G3208 | StTrGN   | $\text{HNO}_4 + \text{OH} \rightarrow \text{NO}_2 + \text{H}_2\text{O}$                                                                     | $1.3\text{E-}12 * \text{EXP}(380./\text{temp})$                                           | Burkholder et al. (2015)  |
| G3209 | TrGN     | $\text{NH}_3 + \text{OH} \rightarrow \text{NH}_2 + \text{H}_2\text{O}$                                                                      | $1.7\text{E-}12 * \text{EXP}(-710./\text{temp})$                                          | Kohlmann and Poppe (1999) |
| G3210 | TrGN     | $\text{NH}_2 + \text{O}_3 \rightarrow \text{NH}_2\text{O} + \text{O}_2$                                                                     | $4.3\text{E-}12 * \text{EXP}(-930./\text{temp})$                                          | Kohlmann and Poppe (1999) |
| G3211 | TrGN     | $\text{NH}_2 + \text{HO}_2 \rightarrow \text{NH}_2\text{O} + \text{OH}$                                                                     | $4.8\text{E-}07 * \text{EXP}(-628./\text{temp}) * (\text{temp})^{**(-1.32)}$              | Kohlmann and Poppe (1999) |
| G3212 | TrGN     | $\text{NH}_2 + \text{HO}_2 \rightarrow \text{HNO} + \text{H}_2\text{O}$                                                                     | $9.4\text{E-}09 * \text{EXP}(-356./\text{temp}) * (\text{temp})^{**(-1.12)}$              | Kohlmann and Poppe (1999) |
| G3213 | TrGN     | $\text{NH}_2 + \text{NO} \rightarrow \text{HO}_2 + \text{OH} + \text{N}_2$                                                                  | $1.92\text{E-}12 * ((\text{temp}/298.)^{**(-1.5)})$                                       | Kohlmann and Poppe (1999) |
| G3214 | TrGN     | $\text{NH}_2 + \text{NO} \rightarrow \text{N}_2 + \text{H}_2\text{O}$                                                                       | $1.41\text{E-}11 * ((\text{temp}/298.)^{**(-1.5)})$                                       | Kohlmann and Poppe (1999) |
| G3215 | TrGN     | $\text{NH}_2 + \text{NO}_2 \rightarrow \text{N}_2\text{O} + \text{H}_2\text{O}$                                                             | $1.2\text{E-}11 * ((\text{temp}/298.)^{**(-2.0)})$                                        | Kohlmann and Poppe (1999) |
| G3216 | TrGN     | $\text{NH}_2 + \text{NO}_2 \rightarrow \text{NH}_2\text{O} + \text{NO}$                                                                     | $0.8\text{E-}11 * ((\text{temp}/298.)^{**(-2.0)})$                                        | Kohlmann and Poppe (1999) |
| G3217 | TrGN     | $\text{NH}_2\text{O} + \text{O}_3 \rightarrow \text{NH}_2 + \text{O}_2$                                                                     | $1.2\text{E-}14$                                                                          | Kohlmann and Poppe (1999) |
| G3218 | TrGN     | $\text{NH}_2\text{O} \rightarrow \text{NHOH}$                                                                                               | $1.3\text{E}3$                                                                            | Kohlmann and Poppe (1999) |
| G3219 | TrGN     | $\text{HNO} + \text{OH} \rightarrow \text{NO} + \text{H}_2\text{O}$                                                                         | $8.0\text{E-}11 * \text{EXP}(-500./\text{temp})$                                          | Kohlmann and Poppe (1999) |
| G3220 | TrGN     | $\text{HNO} + \text{NHOH} \rightarrow \text{NH}_2\text{OH} + \text{NO}$                                                                     | $1.66\text{E-}12 * \text{EXP}(-1500./\text{temp})$                                        | Kohlmann and Poppe (1999) |
| G3221 | TrGN     | $\text{HNO} + \text{NO}_2 \rightarrow \text{HONO} + \text{NO}$                                                                              | $1.0\text{E-}12 * \text{EXP}(-1000./\text{temp})$                                         | Kohlmann and Poppe (1999) |
| G3222 | TrGN     | $\text{NHOH} + \text{OH} \rightarrow \text{HNO} + \text{H}_2\text{O}$                                                                       | $1.66\text{E-}12$                                                                         | Kohlmann and Poppe (1999) |
| G3223 | TrGN     | $\text{NH}_2\text{OH} + \text{OH} \rightarrow \text{NHOH} + \text{H}_2\text{O}$                                                             | $4.13\text{E-}11 * \text{EXP}(-2138./\text{temp})$                                        | Kohlmann and Poppe (1999) |
| G3224 | TrGN     | $\text{HNO} + \text{O}_2 \rightarrow \text{HO}_2 + \text{NO}$                                                                               | $3.65\text{E-}14 * \text{EXP}(-4600./\text{temp})$                                        | Kohlmann and Poppe (1999) |
| G4100 | UpStG    | $\text{CH}_4 + \text{O}(^1\text{D}) \rightarrow .75 \text{CH}_3\text{O}_2 + .75 \text{OH} + .25 \text{HCHO} + .4 \text{H} + .05 \text{H}_2$ | $1.75\text{E-}10$                                                                         | Sander et al. (2011)      |
| G4101 | StTrG    | $\text{CH}_4 + \text{OH} \rightarrow \text{CH}_3\text{O}_2 + \text{H}_2\text{O}$                                                            | $1.85\text{E-}20 * \text{EXP}(2.82 * \text{LOG}(\text{temp}) - 987./\text{temp})$         | Atkinson (2003)           |
| G4102 | TrG      | $\text{CH}_3\text{OH} + \text{OH} \rightarrow \text{HCHO} + \text{HO}_2$                                                                    | $2.9\text{E-}12 * \text{EXP}(-345./\text{temp})$                                          | Sander et al. (2011)      |

Table S1: Gas phase reactions (... continued)

| #      | labels   | reaction                                                                                                                                                                                  | rate coefficient                                                                                       | reference                 |
|--------|----------|-------------------------------------------------------------------------------------------------------------------------------------------------------------------------------------------|--------------------------------------------------------------------------------------------------------|---------------------------|
| G4103  | StTrG    | $\text{CH}_3\text{O}_2 + \text{HO}_2 \rightarrow \text{CH}_3\text{OOH} + \text{O}_2$                                                                                                      | $4.1\text{E-}13 \cdot \text{EXP}(750./\text{temp})$                                                    | Sander et al. (2011)*     |
| G4104  | UpStTrGN | $\text{CH}_3\text{O}_2 + \text{NO} \rightarrow \text{HCHO} + \text{NO}_2 + \text{HO}_2$                                                                                                   | $2.8\text{E-}12 \cdot \text{EXP}(300./\text{temp})$                                                    | Sander et al. (2011)      |
| G4105  | TrGN     | $\text{CH}_3\text{O}_2 + \text{NO}_3 \rightarrow \text{HCHO} + \text{HO}_2 + \text{NO}_2$                                                                                                 | $1.3\text{E-}12$                                                                                       | Atkinson et al. (2006)    |
| G4106a | StTrG    | $\text{CH}_3\text{O}_2 + \text{CH}_3\text{O}_2 \rightarrow 2 \text{HCHO} + 2 \text{HO}_2$                                                                                                 | $9.5\text{E-}14 \cdot \text{EXP}(390./\text{temp}) / (1.+1./26.2 \cdot \text{EXP}(1130./\text{temp}))$ | Sander et al. (2011)      |
| G4106b | StTrG    | $\text{CH}_3\text{O}_2 + \text{CH}_3\text{O}_2 \rightarrow \text{HCHO} + \text{CH}_3\text{OH} + \text{O}_2$                                                                               | $9.5\text{E-}14 \cdot \text{EXP}(390./\text{temp}) / (1.+26.2 \cdot \text{EXP}(-1130./\text{temp}))$   | Sander et al. (2011)      |
| G4107  | StTrG    | $\text{CH}_3\text{OOH} + \text{OH} \rightarrow .7 \text{CH}_3\text{O}_2 + .3 \text{HCHO} + .3 \text{OH} + \text{H}_2\text{O}$                                                             | $k_{\text{CH3OOH\_OH}}$                                                                                | Wallington et al. (2018)  |
| G4108  | StTrG    | $\text{HCHO} + \text{OH} \rightarrow \text{CO} + \text{H}_2\text{O} + \text{HO}_2$                                                                                                        | $9.52\text{E-}18 \cdot \text{EXP}(2.03 \cdot \text{LOG}(\text{temp}) + 636./\text{temp})$              | Sivakumaran et al. (2003) |
| G4109  | TrGN     | $\text{HCHO} + \text{NO}_3 \rightarrow \text{HNO}_3 + \text{CO} + \text{HO}_2$                                                                                                            | $3.4\text{E-}13 \cdot \text{EXP}(-1900./\text{temp})$                                                  | Sander et al. (2011)*     |
| G4110  | UpStTrG  | $\text{CO} + \text{OH} \rightarrow \text{H} + \text{CO}_2$                                                                                                                                | $(1.57\text{E-}13 + \text{cair} \cdot 3.54\text{E-}33)$                                                | McCabe et al. (2001)      |
| G4111  | TrG      | $\text{HCOOH} + \text{OH} \rightarrow \text{CO}_2 + \text{HO}_2 + \text{H}_2\text{O}$                                                                                                     | $4.0\text{E-}13$                                                                                       | Sander et al. (2011)      |
| G4200  | TrGC     | $\text{C}_2\text{H}_6 + \text{OH} \rightarrow \text{C}_2\text{H}_5\text{O}_2 + \text{H}_2\text{O}$                                                                                        | $1.49\text{E-}17 \cdot \text{temp} \cdot \text{temp} \cdot \text{EXP}(-499./\text{temp})$              | Atkinson (2003)           |
| G4201  | TrGC     | $\text{C}_2\text{H}_4 + \text{O}_3 \rightarrow \text{HCHO} + .63 \text{CO} + .13 \text{HO}_2 + 0.23125 \text{HCOOH} + 0.13875 \text{HCHO} + 0.13875 \text{H}_2\text{O}_2 + .13 \text{OH}$ | $1.2\text{E-}14 \cdot \text{EXP}(-2630./\text{temp})$                                                  | Sander et al. (2011)*     |
| G4202  | TrGC     | $\text{C}_2\text{H}_4 + \text{OH} \rightarrow .6666667 \text{CH}_3\text{CH}(\text{O}_2)\text{CH}_2\text{OH}$                                                                              | $k_{\text{3rd}}(\text{temp}, \text{cair}, 1.0\text{E-}28, 4.5, 7.5\text{E-}12, 0.85, 0.6)$             | Sander et al. (2011)      |
| G4203  | TrGC     | $\text{C}_2\text{H}_5\text{O}_2 + \text{HO}_2 \rightarrow \text{C}_2\text{H}_5\text{OOH}$                                                                                                 | $7.5\text{E-}13 \cdot \text{EXP}(700./\text{temp})$                                                    | Sander et al. (2011)      |
| G4204  | TrGCN    | $\text{C}_2\text{H}_5\text{O}_2 + \text{NO} \rightarrow \text{CH}_3\text{CHO} + \text{HO}_2 + \text{NO}_2$                                                                                | $2.6\text{E-}12 \cdot \text{EXP}(365./\text{temp})$                                                    | Sander et al. (2011)      |
| G4205  | TrGCN    | $\text{C}_2\text{H}_5\text{O}_2 + \text{NO}_3 \rightarrow \text{CH}_3\text{CHO} + \text{HO}_2 + \text{NO}_2$                                                                              | $2.3\text{E-}12$                                                                                       | Wallington et al. (2018)  |
| G4206  | TrGC     | $\text{C}_2\text{H}_5\text{O}_2 + \text{CH}_3\text{O}_2 \rightarrow .75 \text{HCHO} + \text{HO}_2 + .75 \text{CH}_3\text{CHO} + .25 \text{CH}_3\text{OH}$                                 | $1.6\text{E-}13 \cdot \text{EXP}(195./\text{temp})$                                                    | see note*                 |
| G4207  | TrGC     | $\text{C}_2\text{H}_5\text{OOH} + \text{OH} \rightarrow .3 \text{C}_2\text{H}_5\text{O}_2 + .7 \text{CH}_3\text{CHO} + .7 \text{OH}$                                                      | $k_{\text{CH3OOH\_OH}}$                                                                                | see note*                 |
| G4208  | TrGC     | $\text{CH}_3\text{CHO} + \text{OH} \rightarrow \text{CH}_3\text{C}(\text{O})\text{OO} + \text{H}_2\text{O}$                                                                               | $4.4\text{E-}12 \cdot \text{EXP}(365./\text{temp})$                                                    | Atkinson et al. (2006)    |
| G4209  | TrGCN    | $\text{CH}_3\text{CHO} + \text{NO}_3 \rightarrow \text{CH}_3\text{C}(\text{O})\text{OO} + \text{HNO}_3$                                                                                   | $1.4\text{E-}12 \cdot \text{EXP}(-1900./\text{temp})$                                                  | Sander et al. (2011)      |
| G4210  | TrGC     | $\text{CH}_3\text{COOH} + \text{OH} \rightarrow \text{CH}_3\text{O}_2 + \text{CO}_2 + \text{H}_2\text{O}$                                                                                 | $4.2\text{E-}14 \cdot \text{EXP}(855./\text{temp})$                                                    | Atkinson et al. (2006)    |
| G4211a | TrGC     | $\text{CH}_3\text{C}(\text{O})\text{OO} + \text{HO}_2 \rightarrow \text{CH}_3\text{C}(\text{O})\text{OOH}$                                                                                | $4.3\text{E-}13 \cdot \text{EXP}(1040./\text{temp}) / (1.+1./37. \cdot \text{EXP}(660./\text{temp}))$  | Tyndall et al. (2001a)    |
| G4211b | TrGC     | $\text{CH}_3\text{C}(\text{O})\text{OO} + \text{HO}_2 \rightarrow \text{CH}_3\text{COOH} + \text{O}_3$                                                                                    | $4.3\text{E-}13 \cdot \text{EXP}(1040./\text{temp}) / (1.+37. \cdot \text{EXP}(-660./\text{temp}))$    | Tyndall et al. (2001a)    |
| G4212  | TrGCN    | $\text{CH}_3\text{C}(\text{O})\text{OO} + \text{NO} \rightarrow \text{CH}_3\text{O}_2 + \text{CO}_2 + \text{NO}_2$                                                                        | $8.1\text{E-}12 \cdot \text{EXP}(270./\text{temp})$                                                    | Tyndall et al. (2001a)    |
| G4213  | TrGCN    | $\text{CH}_3\text{C}(\text{O})\text{OO} + \text{NO}_2 \rightarrow \text{PAN}$                                                                                                             | $k_{\text{CH3CO3\_NO2}}$                                                                               | Sander et al. (2011)*     |
| G4214  | TrGCN    | $\text{CH}_3\text{C}(\text{O})\text{OO} + \text{NO}_3 \rightarrow \text{CH}_3\text{O}_2 + \text{NO}_2 + \text{CO}_2$                                                                      | $4\text{E-}12$                                                                                         | Canosa-Mas et al. (1996)  |

Table S1: Gas phase reactions (... continued)

| #      | labels | reaction                                                                                                                                                                                                                                                                                                                                                    | rate coefficient                                                                                    | reference                                               |
|--------|--------|-------------------------------------------------------------------------------------------------------------------------------------------------------------------------------------------------------------------------------------------------------------------------------------------------------------------------------------------------------------|-----------------------------------------------------------------------------------------------------|---------------------------------------------------------|
| G4215a | TrGC   | $\text{CH}_3\text{C}(\text{O})\text{OO} + \text{CH}_3\text{O}_2 \rightarrow \text{HCHO} + \text{HO}_2 + \text{CH}_3\text{O}_2 + \text{CO}_2$                                                                                                                                                                                                                | $0.9 \times 10^{-12} \times \text{EXP}(500./\text{temp})$                                           | Sander et al. (2011)                                    |
| G4215b | TrGC   | $\text{CH}_3\text{C}(\text{O})\text{OO} + \text{CH}_3\text{O}_2 \rightarrow \text{CH}_3\text{COOH} + \text{HCHO}$                                                                                                                                                                                                                                           | $0.1 \times 10^{-12} \times \text{EXP}(500./\text{temp})$                                           | Sander et al. (2011)                                    |
| G4216  | TrGC   | $\text{CH}_3\text{C}(\text{O})\text{OO} + \text{C}_2\text{H}_5\text{O}_2 \rightarrow .82 \text{ CH}_3\text{O}_2 + \text{CH}_3\text{CHO} + .82 \text{ HO}_2 + .18 \text{ CH}_3\text{COOH}$                                                                                                                                                                   | $4.9 \times 10^{-12} \times \text{EXP}(211./\text{temp})$                                           | Wallington et al. (2018), Kirchner and Stockwell (1996) |
| G4217  | TrGC   | $\text{CH}_3\text{C}(\text{O})\text{OO} + \text{CH}_3\text{C}(\text{O})\text{OO} \rightarrow 2 \text{ CH}_3\text{O}_2 + 2 \text{ CO}_2 + \text{O}_2$                                                                                                                                                                                                        | $2.5 \times 10^{-12} \times \text{EXP}(500./\text{temp})$                                           | Tyndall et al. (2001a)                                  |
| G4218  | TrGC   | $\text{CH}_3\text{C}(\text{O})\text{OOH} + \text{OH} \rightarrow \text{CH}_3\text{C}(\text{O})\text{OO} + \text{H}_2\text{O}$                                                                                                                                                                                                                               | $0.6 \times k_{\text{CH300H\_OH}}$                                                                  | Rickard and Pascoe (2009)                               |
| G4219  | TrGCN  | $\text{NACA} + \text{OH} \rightarrow \text{NO}_2 + \text{HCHO} + \text{CO}$                                                                                                                                                                                                                                                                                 | $5.6 \times 10^{-12} \times \text{EXP}(270./\text{temp})$                                           | Pöschl et al. (2000)                                    |
| G4220  | TrGCN  | $\text{PAN} + \text{OH} \rightarrow \text{HCHO} + \text{CO} + \text{NO}_2 + \text{H}_2\text{O}$                                                                                                                                                                                                                                                             | $9.5 \times 10^{-13} \times \text{EXP}(-650./\text{temp})$                                          | Rickard and Pascoe (2009)                               |
| G4221  | TrGCN  | $\text{PAN} \rightarrow \text{CH}_3\text{C}(\text{O})\text{OO} + \text{NO}_2$                                                                                                                                                                                                                                                                               | $k_{\text{PAN\_M}}$                                                                                 | Sander et al. (2011)*                                   |
| G4222  | TrGC   | $\text{C}_2\text{H}_2 + \text{OH} \rightarrow \text{CH}_3\text{O}_2$                                                                                                                                                                                                                                                                                        | $k_{\text{3rd}}(\text{temp}, \text{cair}, 5.5 \times 10^{-30}, 0.0, 8.3 \times 10^{-13}, -2., 0.6)$ | Sander et al. (2011)                                    |
| G4300  | TrGC   | $\text{C}_3\text{H}_8 + \text{OH} \rightarrow .82 \text{ iC}_3\text{H}_7\text{O}_2 + .18 \text{ C}_2\text{H}_5\text{O}_2 + \text{H}_2\text{O}$                                                                                                                                                                                                              | $1.65 \times 10^{-17} \times \text{temp} \times \text{temp} \times \text{EXP}(-87./\text{temp})$    | Atkinson (2003)                                         |
| G4301  | TrGC   | $\text{C}_3\text{H}_6 + \text{O}_3 \rightarrow .57 \text{ HCHO} + .47 \text{ CH}_3\text{CHO} + .33 \text{ OH} + .26 \text{ HO}_2 + .07 \text{ CH}_3\text{O}_2 + .06 \text{ C}_2\text{H}_5\text{O}_2 + .23 \text{ CH}_3\text{C}(\text{O})\text{OO} + .04 \text{ MGLYOX} + .06 \text{ CH}_4 + .31 \text{ CO} + .22 \text{ HCOOH} + .03 \text{ CH}_3\text{OH}$ | $6.5 \times 10^{-15} \times \text{EXP}(-1900./\text{temp})$                                         | Sander et al. (2011)                                    |
| G4302  | TrGC   | $\text{C}_3\text{H}_6 + \text{OH} \rightarrow \text{CH}_3\text{CH}(\text{O}_2)\text{CH}_2\text{OH}$                                                                                                                                                                                                                                                         | $k_{\text{3rd}}(\text{temp}, \text{cair}, 8 \times 10^{-27}, 3.5, 3 \times 10^{-11}, 0., 0.5)$      | Wallington et al. (2018)                                |
| G4303  | TrGCN  | $\text{C}_3\text{H}_6 + \text{NO}_3 \rightarrow \text{LC4H9NO3}$                                                                                                                                                                                                                                                                                            | $4.6 \times 10^{-13} \times \text{EXP}(-1155./\text{temp})$                                         | Wallington et al. (2018)                                |
| G4304  | TrGC   | $\text{iC}_3\text{H}_7\text{O}_2 + \text{HO}_2 \rightarrow \text{iC}_3\text{H}_7\text{OOH}$                                                                                                                                                                                                                                                                 | $k_{\text{PrO2\_HO2}}$                                                                              | Atkinson (1997)                                         |
| G4305  | TrGCN  | $\text{iC}_3\text{H}_7\text{O}_2 + \text{NO} \rightarrow .96 \text{ CH}_3\text{COCH}_3 + .96 \text{ HO}_2 + .96 \text{ NO}_2 + .04 \text{ iC}_3\text{H}_7\text{ONO}_2$                                                                                                                                                                                      | $k_{\text{PrO2\_NO}}$                                                                               | Wallington et al. (2018)                                |
| G4306  | TrGC   | $\text{iC}_3\text{H}_7\text{O}_2 + \text{CH}_3\text{O}_2 \rightarrow \text{CH}_3\text{COCH}_3 + .8 \text{ HCHO} + .8 \text{ HO}_2 + .2 \text{ CH}_3\text{OH}$                                                                                                                                                                                               | $k_{\text{PrO2\_CH3O2}}$                                                                            | Kirchner and Stockwell (1996)                           |
| G4307  | TrGC   | $\text{iC}_3\text{H}_7\text{OOH} + \text{OH} \rightarrow .3 \text{ iC}_3\text{H}_7\text{O}_2 + .7 \text{ CH}_3\text{COCH}_3 + .7 \text{ OH}$                                                                                                                                                                                                                | $k_{\text{CH300H\_OH}}$                                                                             | see note*                                               |
| G4308  | TrGC   | $\text{CH}_3\text{CH}(\text{O}_2)\text{CH}_2\text{OH} + \text{HO}_2 \rightarrow \text{CH}_3\text{CH}(\text{OOH})\text{CH}_2\text{OH}$                                                                                                                                                                                                                       | $6.5 \times 10^{-13} \times \text{EXP}(650./\text{temp})$                                           | Müller and Brasseur (1995)                              |
| G4309  | TrGCN  | $\text{CH}_3\text{CH}(\text{O}_2)\text{CH}_2\text{OH} + \text{NO} \rightarrow .98 \text{ CH}_3\text{CHO} + .98 \text{ HCHO} + .98 \text{ HO}_2 + .98 \text{ NO}_2 + .02 \text{ LC4H9NO3}$                                                                                                                                                                   | $4.2 \times 10^{-12} \times \text{EXP}(180./\text{temp})$                                           | Müller and Brasseur (1995)                              |
| G4310  | TrGC   | $\text{CH}_3\text{CH}(\text{OOH})\text{CH}_2\text{OH} + \text{OH} \rightarrow .5 \text{ CH}_3\text{CH}(\text{O}_2)\text{CH}_2\text{OH} + .5 \text{ CH}_3\text{COCH}_2\text{OH} + .5 \text{ OH} + \text{H}_2\text{O}$                                                                                                                                        | $3.8 \times 10^{-12} \times \text{EXP}(200./\text{temp})$                                           | Müller and Brasseur (1995)                              |
| G4311  | TrGC   | $\text{CH}_3\text{COCH}_3 + \text{OH} \rightarrow \text{CH}_3\text{COCH}_2\text{O}_2 + \text{H}_2\text{O}$                                                                                                                                                                                                                                                  | $1.33 \times 10^{-13} + 3.82 \times 10^{-11} \times \text{EXP}(-2000./\text{temp})$                 | Sander et al. (2011)                                    |
| G4312  | TrGC   | $\text{CH}_3\text{COCH}_2\text{O}_2 + \text{HO}_2 \rightarrow \text{CH}_3\text{COCH}_2\text{O}_2\text{H}$                                                                                                                                                                                                                                                   | $8.6 \times 10^{-13} \times \text{EXP}(700./\text{temp})$                                           | Tyndall et al. (2001a)                                  |
| G4313  | TrGCN  | $\text{CH}_3\text{COCH}_2\text{O}_2 + \text{NO} \rightarrow \text{CH}_3\text{C}(\text{O})\text{OO} + \text{HCHO} + \text{NO}_2$                                                                                                                                                                                                                             | $2.9 \times 10^{-12} \times \text{EXP}(300./\text{temp})$                                           | Sander et al. (2011)                                    |

Table S1: Gas phase reactions (... continued)

| #     | labels | reaction                                                                                                                                                                                                                                              | rate coefficient                                                                                                         | reference                |
|-------|--------|-------------------------------------------------------------------------------------------------------------------------------------------------------------------------------------------------------------------------------------------------------|--------------------------------------------------------------------------------------------------------------------------|--------------------------|
| G4314 | TrGC   | $\text{CH}_3\text{COCH}_2\text{O}_2 + \text{CH}_3\text{O}_2 \rightarrow .5 \text{ MGLYOX} + .5 \text{ CH}_3\text{OH} + .3 \text{ CH}_3\text{C}(\text{O})\text{OO} + .8 \text{ HCHO} + .3 \text{ HO}_2 + .2 \text{ CH}_3\text{COCH}_2\text{OH}$        | $7.5\text{E-}13 \cdot \text{EXP}(500./\text{temp})$                                                                      | Tyndall et al. (2001a)   |
| G4315 | TrGC   | $\text{CH}_3\text{COCH}_2\text{O}_2\text{H} + \text{OH} \rightarrow .3 \text{ CH}_3\text{COCH}_2\text{O}_2 + .7 \text{ MGLYOX} + .7 \text{ OH}$                                                                                                       | $k_{\text{CH300H\_OH}}$                                                                                                  | see note*                |
| G4316 | TrGC   | $\text{CH}_3\text{COCH}_2\text{OH} + \text{OH} \rightarrow \text{MGLYOX} + \text{HO}_2$                                                                                                                                                               | $2.15\text{E-}12 \cdot \text{EXP}(305./\text{temp})$                                                                     | Dillon et al. (2006)     |
| G4317 | TrGC   | $\text{MGLYOX} + \text{OH} \rightarrow \text{CH}_3\text{C}(\text{O})\text{OO} + \text{CO}$                                                                                                                                                            | $8.4\text{E-}13 \cdot \text{EXP}(830./\text{temp})$                                                                      | Tyndall et al. (1995)    |
| G4320 | TrGCN  | $\text{iC}_3\text{H}_7\text{ONO}_2 + \text{OH} \rightarrow \text{CH}_3\text{COCH}_3 + \text{NO}_2$                                                                                                                                                    | $6.2\text{E-}13 \cdot \text{EXP}(-230./\text{temp})$                                                                     | Wallington et al. (2018) |
| G4400 | TrGC   | $\text{C}_4\text{H}_{10} + \text{OH} \rightarrow \text{LC}_4\text{H}_9\text{O}_2 + \text{H}_2\text{O}$                                                                                                                                                | $1.81\text{E-}17 \cdot \text{temp} \cdot \text{temp} \cdot \text{EXP}(114./\text{temp})$                                 | Atkinson (2003)          |
| G4401 | TrGC   | $\text{LC}_4\text{H}_9\text{O}_2 + \text{CH}_3\text{O}_2 \rightarrow .88 \text{ MEK} + .68 \text{ HCHO} + 1.23 \text{ HO}_2 + .12 \text{ CH}_3\text{CHO} + .12 \text{ C}_2\text{H}_5\text{O}_2 + .18 \text{ CH}_3\text{OH}$                           | $k_{\text{PrO2\_CH3O2}}$                                                                                                 | see note*                |
| G4402 | TrGC   | $\text{LC}_4\text{H}_9\text{O}_2 + \text{HO}_2 \rightarrow \text{LC}_4\text{H}_9\text{OOH}$                                                                                                                                                           | $k_{\text{PrO2\_HO2}}$                                                                                                   | see note*                |
| G4403 | TrGCN  | $\text{LC}_4\text{H}_9\text{O}_2 + \text{NO} \rightarrow .84 \text{ NO}_2 + .56 \text{ MEK} + .56 \text{ HO}_2 + .28 \text{ C}_2\text{H}_5\text{O}_2 + .28 \text{ CH}_3\text{CHO} + .16 \text{ LC}_4\text{H}_9\text{NO}_3$                            | $k_{\text{PrO2\_NO}}$                                                                                                    | see note*                |
| G4404 | TrGC   | $\text{LC}_4\text{H}_9\text{OOH} + \text{OH} \rightarrow .15 \text{ LC}_4\text{H}_9\text{O}_2 + .85 \text{ MEK} + .85 \text{ OH} + .85 \text{ H}_2\text{O}$                                                                                           | $k_{\text{CH300H\_OH}}$                                                                                                  | see note*                |
| G4405 | TrGC   | $\text{MVK} + \text{O}_3 \rightarrow .45 \text{ HCOOH} + .9 \text{ MGLYOX} + .1 \text{ CH}_3\text{C}(\text{O})\text{OO} + .19 \text{ OH} + .22 \text{ CO} + .32 \text{ HO}_2$                                                                         | $.5 \cdot (1.36\text{E-}15 \cdot \text{EXP}(-2112./\text{temp}) + 7.51\text{E-}16 \cdot \text{EXP}(-1521./\text{temp}))$ | Pöschl et al. (2000)     |
| G4406 | TrGC   | $\text{MVK} + \text{OH} \rightarrow \text{MVKO}_2$                                                                                                                                                                                                    | $.5 \cdot (4.1\text{E-}12 \cdot \text{EXP}(452./\text{temp}) + 1.9\text{E-}11 \cdot \text{EXP}(175./\text{temp}))$       | Pöschl et al. (2000)     |
| G4407 | TrGC   | $\text{MVKO}_2 + \text{HO}_2 \rightarrow \text{MVKOOH}$                                                                                                                                                                                               | $1.82\text{E-}13 \cdot \text{EXP}(1300./\text{temp})$                                                                    | Pöschl et al. (2000)     |
| G4408 | TrGCN  | $\text{MVKO}_2 + \text{NO} \rightarrow \text{NO}_2 + .25 \text{ CH}_3\text{C}(\text{O})\text{OO} + .25 \text{ CH}_3\text{COCH}_2\text{OH} + .75 \text{ HCHO} + .25 \text{ CO} + .75 \text{ HO}_2 + .5 \text{ MGLYOX}$                                 | $2.54\text{E-}12 \cdot \text{EXP}(360./\text{temp})$                                                                     | Pöschl et al. (2000)     |
| G4409 | TrGCN  | $\text{MVKO}_2 + \text{NO}_2 \rightarrow \text{MPAN}$                                                                                                                                                                                                 | $.25 \cdot k_{\text{3rd}}(\text{temp}, \text{cair}, 9.7\text{E-}29, 5.6, 9.3\text{E-}12, 1.5, 0.6)$                      | Pöschl et al. (2000)     |
| G4410 | TrGC   | $\text{MVKO}_2 + \text{CH}_3\text{O}_2 \rightarrow .5 \text{ MGLYOX} + .375 \text{ CH}_3\text{COCH}_2\text{OH} + .125 \text{ CH}_3\text{C}(\text{O})\text{OO} + 1.125 \text{ HCHO} + .875 \text{ HO}_2 + .125 \text{ CO} + .25 \text{ CH}_3\text{OH}$ | $2.\text{E-}12$                                                                                                          | von Kuhlmann (2001)      |
| G4411 | TrGC   | $\text{MVKO}_2 + \text{MVKO}_2 \rightarrow \text{CH}_3\text{COCH}_2\text{OH} + \text{MGLYOX} + .5 \text{ CO} + .5 \text{ HCHO} + \text{HO}_2$                                                                                                         | $2.\text{E-}12$                                                                                                          | Pöschl et al. (2000)     |
| G4412 | TrGC   | $\text{MVKOOH} + \text{OH} \rightarrow \text{MVKO}_2$                                                                                                                                                                                                 | $3.\text{E-}11$                                                                                                          | Pöschl et al. (2000)     |
| G4413 | TrGC   | $\text{MEK} + \text{OH} \rightarrow \text{LMEKO}_2$                                                                                                                                                                                                   | $1.3\text{E-}12 \cdot \text{EXP}(-25./\text{temp})$                                                                      | Wallington et al. (2018) |
| G4414 | TrGC   | $\text{LMEKO}_2 + \text{HO}_2 \rightarrow \text{LMEKOOH}$                                                                                                                                                                                             | $k_{\text{PrO2\_HO2}}$                                                                                                   | see note*                |
| G4415 | TrGCN  | $\text{LMEKO}_2 + \text{NO} \rightarrow .985 \text{ CH}_3\text{CHO} + .985 \text{ CH}_3\text{C}(\text{O})\text{OO} + .985 \text{ NO}_2 + .015 \text{ LC}_4\text{H}_9\text{NO}_3$                                                                      | $k_{\text{PrO2\_NO}}$                                                                                                    | see note*                |

Table S1: Gas phase reactions (... continued)

| #      | labels     | reaction                                                                                                                                                                                                                                                               | rate coefficient                                                      | reference                 |
|--------|------------|------------------------------------------------------------------------------------------------------------------------------------------------------------------------------------------------------------------------------------------------------------------------|-----------------------------------------------------------------------|---------------------------|
| G4416  | TrGC       | $\text{LMEKOOH} + \text{OH} \rightarrow .8 \text{ BIACET} + .8 \text{ OH} + .2 \text{ LMEKO2}$                                                                                                                                                                         | $k_{\text{CH3OOH\_OH}}$                                               | see note*                 |
| G4417  | TrGCN      | $\text{LC4H9NO3} + \text{OH} \rightarrow \text{MEK} + \text{NO}_2 + \text{H}_2\text{O}$                                                                                                                                                                                | $1.7\text{E}-12$                                                      | Wallington et al. (2018)  |
| G4418  | TrGCN      | $\text{MPAN} + \text{OH} \rightarrow \text{CH}_3\text{COCH}_2\text{OH} + \text{NO}_2$                                                                                                                                                                                  | $3.2\text{E}-11$                                                      | Orlando et al. (2002)     |
| G4419  | TrGCN      | $\text{MPAN} \rightarrow \text{MVKO2} + \text{NO}_2$                                                                                                                                                                                                                   | $k_{\text{PAN\_M}}$                                                   | see note*                 |
| G4500  | TrGC       | $\text{C}_5\text{H}_8 + \text{O}_3 \rightarrow .28 \text{ HCOOH} + .65 \text{ MVK} + .1 \text{ MVKO2} + .1 \text{ CH}_3\text{C(O)OO} + .14 \text{ CO} + .58 \text{ HCHO} + .09 \text{ H}_2\text{O}_2 + .08 \text{ CH}_3\text{O}_2 + .25 \text{ OH} + .25 \text{ HO}_2$ | $7.86\text{E}-15*\text{EXP}(-1913./\text{temp})$                      | Pöschl et al. (2000)      |
| G4501  | TrGC       | $\text{C}_5\text{H}_8 + \text{OH} \rightarrow \text{ISO2}$                                                                                                                                                                                                             | $2.54\text{E}-11*\text{EXP}(410./\text{temp})$                        | Pöschl et al. (2000)      |
| G4502  | TrGCN      | $\text{C}_5\text{H}_8 + \text{NO}_3 \rightarrow \text{ISON}$                                                                                                                                                                                                           | $3.03\text{E}-12*\text{EXP}(-446./\text{temp})$                       | Pöschl et al. (2000)      |
| G4503  | TrGC       | $\text{ISO2} + \text{HO}_2 \rightarrow \text{ISOOH}$                                                                                                                                                                                                                   | $2.22\text{E}-13*\text{EXP}(1300./\text{temp})$                       | Boyd et al. (2003)        |
| G4504  | TrGCN      | $\text{ISO2} + \text{NO} \rightarrow .956 \text{ NO}_2 + .956 \text{ MVK} + .956 \text{ HCHO} + .956 \text{ HO}_2 + .044 \text{ ISON}$                                                                                                                                 | $2.54\text{E}-12*\text{EXP}(360./\text{temp})$                        | Pöschl et al. (2000)      |
| G4505  | TrGC       | $\text{ISO2} + \text{CH}_3\text{O}_2 \rightarrow .5 \text{ MVK} + 1.25 \text{ HCHO} + \text{HO}_2 + .25 \text{ MGLYOX} + .25 \text{ CH}_3\text{COCH}_2\text{OH} + .25 \text{ CH}_3\text{OH}$                                                                           | $2\text{E}-12$                                                        | von Kuhlmann (2001)       |
| G4506  | TrGC       | $\text{ISO2} + \text{ISO2} \rightarrow 2 \text{ MVK} + \text{HCHO} + \text{HO}_2$                                                                                                                                                                                      | $2\text{E}-12$                                                        | Pöschl et al. (2000)      |
| G4507  | TrGC       | $\text{ISOOH} + \text{OH} \rightarrow \text{MVK} + \text{OH}$                                                                                                                                                                                                          | $1\text{E}-10$                                                        | Pöschl et al. (2000)      |
| G4508  | TrGCN      | $\text{ISON} + \text{OH} \rightarrow \text{CH}_3\text{COCH}_2\text{OH} + \text{NACA}$                                                                                                                                                                                  | $1.3\text{E}-11$                                                      | Pöschl et al. (2000)      |
| G6100  | UpStTrGCl  | $\text{Cl} + \text{O}_3 \rightarrow \text{ClO} + \text{O}_2$                                                                                                                                                                                                           | $2.8\text{E}-11*\text{EXP}(-250./\text{temp})$                        | Atkinson et al. (2007)    |
| G6101  | UpStGCl    | $\text{ClO} + \text{O}(^3\text{P}) \rightarrow \text{Cl} + \text{O}_2$                                                                                                                                                                                                 | $2.5\text{E}-11*\text{EXP}(110./\text{temp})$                         | Atkinson et al. (2007)    |
| G6102a | StTrGCl    | $\text{ClO} + \text{ClO} \rightarrow \text{Cl}_2 + \text{O}_2$                                                                                                                                                                                                         | $1.0\text{E}-12*\text{EXP}(-1590./\text{temp})$                       | Atkinson et al. (2007)    |
| G6102b | StTrGCl    | $\text{ClO} + \text{ClO} \rightarrow 2 \text{ Cl} + \text{O}_2$                                                                                                                                                                                                        | $3.0\text{E}-11*\text{EXP}(-2450./\text{temp})$                       | Atkinson et al. (2007)    |
| G6102c | StTrGCl    | $\text{ClO} + \text{ClO} \rightarrow \text{Cl} + \text{OClO}$                                                                                                                                                                                                          | $3.5\text{E}-13*\text{EXP}(-1370./\text{temp})$                       | Atkinson et al. (2007)    |
| G6102d | StTrGCl    | $\text{ClO} + \text{ClO} \rightarrow \text{Cl}_2\text{O}_2$                                                                                                                                                                                                            | $k_{\text{ClO\_ClO}}$                                                 | Burkholder et al. (2015)  |
| G6103  | StTrGCl    | $\text{Cl}_2\text{O}_2 \rightarrow \text{ClO} + \text{ClO}$                                                                                                                                                                                                            | $k_{\text{ClO\_ClO}}/(2.16\text{E}-27*\text{EXP}(8537./\text{temp}))$ | Burkholder et al. (2015)* |
| G6200  | StGCl      | $\text{Cl} + \text{H}_2 \rightarrow \text{HCl} + \text{H}$                                                                                                                                                                                                             | $3.9\text{E}-11*\text{EXP}(-2310./\text{temp})$                       | Atkinson et al. (2007)    |
| G6201a | StGCl      | $\text{Cl} + \text{HO}_2 \rightarrow \text{HCl} + \text{O}_2$                                                                                                                                                                                                          | $4.4\text{E}-11-7.5\text{E}-11*\text{EXP}(-620./\text{temp})$         | Atkinson et al. (2007)    |
| G6201b | StGCl      | $\text{Cl} + \text{HO}_2 \rightarrow \text{ClO} + \text{OH}$                                                                                                                                                                                                           | $7.5\text{E}-11*\text{EXP}(-620./\text{temp})$                        | Atkinson et al. (2007)    |
| G6202  | StTrGCl    | $\text{Cl} + \text{H}_2\text{O}_2 \rightarrow \text{HCl} + \text{HO}_2$                                                                                                                                                                                                | $1.1\text{E}-11*\text{EXP}(-980./\text{temp})$                        | Atkinson et al. (2007)    |
| G6203  | StGCl      | $\text{ClO} + \text{OH} \rightarrow .94 \text{ Cl} + .94 \text{ HO}_2 + .06 \text{ HCl} + .06 \text{ O}_2$                                                                                                                                                             | $7.3\text{E}-12*\text{EXP}(300./\text{temp})$                         | Atkinson et al. (2007)    |
| G6204  | StTrGCl    | $\text{ClO} + \text{HO}_2 \rightarrow \text{HOCl} + \text{O}_2$                                                                                                                                                                                                        | $2.2\text{E}-12*\text{EXP}(340./\text{temp})$                         | Atkinson et al. (2007)*   |
| G6205  | StTrGCl    | $\text{HCl} + \text{OH} \rightarrow \text{Cl} + \text{H}_2\text{O}$                                                                                                                                                                                                    | $1.7\text{E}-12*\text{EXP}(-230./\text{temp})$                        | Atkinson et al. (2007)    |
| G6206  | StGCl      | $\text{HOCl} + \text{OH} \rightarrow \text{ClO} + \text{H}_2\text{O}$                                                                                                                                                                                                  | $3.0\text{E}-12*\text{EXP}(-500./\text{temp})$                        | Burkholder et al. (2015)  |
| G6300  | UpStTrGCIN | $\text{ClO} + \text{NO} \rightarrow \text{NO}_2 + \text{Cl}$                                                                                                                                                                                                           | $6.2\text{E}-12*\text{EXP}(295./\text{temp})$                         | Atkinson et al. (2007)    |

Table S1: Gas phase reactions (... continued)

| #      | labels   | reaction                                                                                                                   | rate coefficient                                                                                 | reference                  |
|--------|----------|----------------------------------------------------------------------------------------------------------------------------|--------------------------------------------------------------------------------------------------|----------------------------|
| G6301  | StTrGCIN | $\text{ClO} + \text{NO}_2 \rightarrow \text{ClNO}_3$                                                                       | $\text{k\_3rd\_iupac}(\text{temp}, \text{cair}, 1.6\text{E-}31, 3.4, 7.\text{E-}11, 0., 0.4)$    | Atkinson et al. (2007)     |
| G6302  | TrGCIN   | $\text{ClNO}_3 \rightarrow \text{ClO} + \text{NO}_2$                                                                       | $6.918\text{E-}7 * \text{EXP}(-10909./\text{temp}) * \text{cair}$                                | Anderson and Fahey (1990)  |
| G6303  | StGCIN   | $\text{ClNO}_3 + \text{O}(^3\text{P}) \rightarrow \text{ClO} + \text{NO}_3$                                                | $4.5\text{E-}12 * \text{EXP}(-900./\text{temp})$                                                 | Atkinson et al. (2007)     |
| G6304  | StTrGCIN | $\text{ClNO}_3 + \text{Cl} \rightarrow \text{Cl}_2 + \text{NO}_3$                                                          | $6.2\text{E-}12 * \text{EXP}(145./\text{temp})$                                                  | Atkinson et al. (2007)     |
| G6400  | StTrGCl  | $\text{Cl} + \text{CH}_4 \rightarrow \text{HCl} + \text{CH}_3\text{O}_2$                                                   | $6.6\text{E-}12 * \text{EXP}(-1240./\text{temp})$                                                | Atkinson et al. (2006)     |
| G6401  | StTrGCl  | $\text{Cl} + \text{HCHO} \rightarrow \text{HCl} + \text{CO} + \text{HO}_2$                                                 | $8.1\text{E-}11 * \text{EXP}(-34./\text{temp})$                                                  | Atkinson et al. (2006)     |
| G6402  | StTrGCl  | $\text{Cl} + \text{CH}_3\text{OOH} \rightarrow \text{HCHO} + \text{HCl} + \text{OH}$                                       | $5.9\text{E-}11$                                                                                 | Atkinson et al. (2006)*    |
| G6403  | StTrGCl  | $\text{ClO} + \text{CH}_3\text{O}_2 \rightarrow \text{HO}_2 + \text{Cl} + \text{HCHO}$                                     | $1.8\text{E-}12 * \text{EXP}(-600./\text{temp})$                                                 | Burkholder et al. (2015)   |
| G6404  | StGCl    | $\text{CCl}_4 + \text{O}(^1\text{D}) \rightarrow \text{LCARBON} + \text{ClO} + 3 \text{ Cl}$                               | $3.3\text{E-}10$                                                                                 | Burkholder et al. (2015)   |
| G6405  | StGCl    | $\text{CH}_3\text{Cl} + \text{O}(^1\text{D}) \rightarrow \text{OH} + \text{Cl}$                                            | $1.65\text{E-}10$                                                                                | see note*                  |
| G6406  | StGCl    | $\text{CH}_3\text{Cl} + \text{OH} \rightarrow \text{LCARBON} + \text{H}_2\text{O} + \text{Cl}$                             | $1.96\text{E-}12 * \text{EXP}(-1200./\text{temp})$                                               | Burkholder et al. (2015)   |
| G6407  | StGCCl   | $\text{CH}_3\text{CCl}_3 + \text{O}(^1\text{D}) \rightarrow 2 \text{ LCARBON} + \text{OH} + 3 \text{ Cl}$                  | $3.25\text{E-}10$                                                                                | Burkholder et al. (2015)   |
| G6408  | StTrGCCl | $\text{CH}_3\text{CCl}_3 + \text{OH} \rightarrow 2 \text{ LCARBON} + \text{H}_2\text{O} + 3 \text{ Cl}$                    | $1.64\text{E-}12 * \text{EXP}(-1520./\text{temp})$                                               | Burkholder et al. (2015)   |
| G6409  | TrGCCl   | $\text{Cl} + \text{C}_2\text{H}_4 \rightarrow .6666667 \text{ CH}_3\text{CH}(\text{O}_2)\text{CH}_2\text{OH} + \text{HCl}$ | $\text{k\_3rd\_iupac}(\text{temp}, \text{cair}, 1.85\text{E-}29, 3.3, 6.0\text{E-}10, 0.0, 0.4)$ | Atkinson et al. (2006)     |
| G6410  | TrGCCl   | $\text{Cl} + \text{CH}_3\text{CHO} \rightarrow \text{HCl} + \text{CH}_3\text{C}(\text{O})\text{OO}$                        | $8.0\text{e-}11$                                                                                 | Atkinson et al. (2006)     |
| G6411  | TrGCCl   | $\text{C}_2\text{H}_2 + \text{Cl} \rightarrow \text{LCARBON} + \text{CH}_3 + \text{HCl}$                                   | $\text{k\_3rd\_iupac}(\text{temp}, \text{cair}, 6.1\text{e-}30, 3.0, 2.0\text{e-}10, 0., 0.6)$   | Atkinson et al. (2006)     |
| G6412  | TrGCCl   | $\text{C}_2\text{H}_6 + \text{Cl} \rightarrow \text{C}_2\text{H}_5\text{O}_2 + \text{HCl}$                                 | $8.3\text{E-}11 * \text{EXP}(-100./\text{temp})$                                                 | Atkinson et al. (2006)     |
| G6500  | StGClF   | $\text{CF}_2\text{Cl}_2 + \text{O}(^1\text{D}) \rightarrow \text{LCARBON} + 2 \text{ LFLUORINE} + \text{ClO} + \text{Cl}$  | $1.4\text{E-}10$                                                                                 | Burkholder et al. (2015)   |
| G6501  | StGClF   | $\text{CFCl}_3 + \text{O}(^1\text{D}) \rightarrow \text{LCARBON} + \text{LFLUORINE} + \text{ClO} + 2 \text{ Cl}$           | $2.3\text{E-}10$                                                                                 | Burkholder et al. (2015)   |
| G7100  | StTrGBr  | $\text{Br} + \text{O}_3 \rightarrow \text{BrO} + \text{O}_2$                                                               | $1.7\text{E-}11 * \text{EXP}(-800./\text{temp})$                                                 | Atkinson et al. (2007)     |
| G7101  | StGBr    | $\text{BrO} + \text{O}(^3\text{P}) \rightarrow \text{Br} + \text{O}_2$                                                     | $1.9\text{E-}11 * \text{EXP}(230./\text{temp})$                                                  | Atkinson et al. (2007)     |
| G7102a | StTrGBr  | $\text{BrO} + \text{BrO} \rightarrow 2 \text{ Br} + \text{O}_2$                                                            | $2.7\text{E-}12$                                                                                 | Atkinson et al. (2007)     |
| G7102b | StTrGBr  | $\text{BrO} + \text{BrO} \rightarrow \text{Br}_2 + \text{O}_2$                                                             | $2.9\text{E-}14 * \text{EXP}(840./\text{temp})$                                                  | Atkinson et al. (2007)     |
| G7200  | StTrGBr  | $\text{Br} + \text{HO}_2 \rightarrow \text{HBr} + \text{O}_2$                                                              | $7.7\text{E-}12 * \text{EXP}(-450./\text{temp})$                                                 | Atkinson et al. (2007)     |
| G7201  | StTrGBr  | $\text{BrO} + \text{HO}_2 \rightarrow \text{HOBr} + \text{O}_2$                                                            | $4.5\text{E-}12 * \text{EXP}(500./\text{temp})$                                                  | Atkinson et al. (2007)     |
| G7202  | StTrGBr  | $\text{HBr} + \text{OH} \rightarrow \text{Br} + \text{H}_2\text{O}$                                                        | $6.7\text{E-}12 * \text{EXP}(155./\text{temp})$                                                  | Atkinson et al. (2007)     |
| G7203  | StGBr    | $\text{HOBr} + \text{O}(^3\text{P}) \rightarrow \text{OH} + \text{BrO}$                                                    | $1.2\text{E-}10 * \text{EXP}(-430./\text{temp})$                                                 | Atkinson et al. (2007)     |
| G7204  | StTrGBr  | $\text{Br}_2 + \text{OH} \rightarrow \text{HOBr} + \text{Br}$                                                              | $2.0\text{E-}11 * \text{EXP}(240./\text{temp})$                                                  | Atkinson et al. (2007)     |
| G7300  | TrGBrN   | $\text{Br} + \text{BrNO}_3 \rightarrow \text{Br}_2 + \text{NO}_3$                                                          | $4.9\text{E-}11$                                                                                 | Orlando and Tyndall (1996) |
| G7301  | StTrGBrN | $\text{BrO} + \text{NO} \rightarrow \text{Br} + \text{NO}_2$                                                               | $8.7\text{E-}12 * \text{EXP}(260./\text{temp})$                                                  | Atkinson et al. (2007)     |

Table S1: Gas phase reactions (... continued)

| #      | labels    | reaction                                                                                                                                               | rate coefficient                                                                                                                          | reference                                              |
|--------|-----------|--------------------------------------------------------------------------------------------------------------------------------------------------------|-------------------------------------------------------------------------------------------------------------------------------------------|--------------------------------------------------------|
| G7302  | StTrGBrN  | $\text{BrO} + \text{NO}_2 \rightarrow \text{BrNO}_3$                                                                                                   | $k_{\text{BrO\_NO2}}$                                                                                                                     | Atkinson et al. (2007)*                                |
| G7303  | TrGBrN    | $\text{BrNO}_3 \rightarrow \text{BrO} + \text{NO}_2$                                                                                                   | $k_{\text{BrO\_NO2}}/(5.44\text{E-}9*\text{EXP}(14192./\text{temp})*1.\text{E6}*R_{\text{gas}}*\text{temp}/(\text{atm2Pa}*N_{\text{A}}))$ | Orlando and Tyndall (1996),<br>Atkinson et al. (2007)* |
| G7400  | StTrGBr   | $\text{Br} + \text{HCHO} \rightarrow \text{HBr} + \text{CO} + \text{HO}_2$                                                                             | $7.7\text{E-}12*\text{EXP}(-580./\text{temp})$                                                                                            | Atkinson et al. (2006)                                 |
| G7401  | TrGBr     | $\text{Br} + \text{CH}_3\text{OOH} \rightarrow \text{CH}_3\text{O}_2 + \text{HBr}$                                                                     | $2.6\text{E-}12*\text{EXP}(-1600./\text{temp})$                                                                                           | Kondo and Benson (1984)                                |
| G7402a | TrGBr     | $\text{BrO} + \text{CH}_3\text{O}_2 \rightarrow \text{HOBr} + \text{HCHO}$                                                                             | $f_{\text{BrO\_CH3O2}}*5.7\text{E-}12$                                                                                                    | Aranda et al. (1997)                                   |
| G7402b | TrGBr     | $\text{BrO} + \text{CH}_3\text{O}_2 \rightarrow \text{Br} + \text{HCHO} + \text{HO}_2$                                                                 | $(1.-f_{\text{BrO\_CH3O2}})*5.7\text{E-}12$                                                                                               | Aranda et al. (1997)                                   |
| G7403  | StTrGBr   | $\text{CH}_3\text{Br} + \text{OH} \rightarrow \text{LCARBON} + \text{H}_2\text{O} + \text{Br}$                                                         | $1.42\text{E-}12*\text{EXP}(-1150./\text{temp})$                                                                                          | Burkholder et al. (2015)                               |
| G7404  | TrGBrC    | $\text{Br} + \text{C}_2\text{H}_4 \rightarrow .6666667 \text{ CH}_3\text{CH}(\text{O}_2)\text{CH}_2\text{OH} + \text{HBr}$                             | $2.8\text{E-}13*\text{EXP}(224./\text{temp})/(1.+1.13\text{E}24*\text{EXP}(-3200./\text{temp})/C(\text{ind\_O2}))$                        | Atkinson et al. (2006)                                 |
| G7405  | TrGBrC    | $\text{Br} + \text{CH}_3\text{CHO} \rightarrow \text{HBr} + \text{CH}_3\text{C}(\text{O})\text{OO}$                                                    | $1.8\text{E-}11*\text{EXP}(-460./\text{temp})$                                                                                            | Atkinson et al. (2006)                                 |
| G7406  | TrGBrC    | $\text{Br} + \text{C}_2\text{H}_2 \rightarrow \text{LCARBON} + \text{CH}_3\text{O}_2 + \text{HBr}$                                                     | $6.35\text{E-}15*\text{EXP}(440./\text{temp})$                                                                                            | Atkinson et al. (2006)                                 |
| G7407  | TrGBr     | $\text{CHBr}_3 + \text{OH} \rightarrow \text{LCARBON} + \text{H}_2\text{O} + 3 \text{ Br}$                                                             | $9.0\text{E-}13*\text{EXP}(-360./\text{temp})$                                                                                            | Burkholder et al. (2015)*                              |
| G7408  | TrGBr     | $\text{CH}_2\text{Br}_2 + \text{OH} \rightarrow \text{LCARBON} + \text{H}_2\text{O} + 2 \text{ Br}$                                                    | $2.0\text{E-}12*\text{EXP}(-840./\text{temp})$                                                                                            | Burkholder et al. (2015)*                              |
| G7600  | TrGBrCl   | $\text{Br} + \text{BrCl} \rightarrow \text{Br}_2 + \text{Cl}$                                                                                          | $3.32\text{E-}15$                                                                                                                         | Manion et al. (2015)                                   |
| G7601  | TrGBrCl   | $\text{Br} + \text{Cl}_2 \rightarrow \text{BrCl} + \text{Cl}$                                                                                          | $1.10\text{E-}15$                                                                                                                         | Dolson and Leone (1987)                                |
| G7602  | TrGBrCl   | $\text{Br}_2 + \text{Cl} \rightarrow \text{BrCl} + \text{Br}$                                                                                          | $2.3\text{E-}10*\text{EXP}(135./\text{temp})$                                                                                             | Bedjanian et al. (1998)                                |
| G7603a | StTrGBrCl | $\text{BrO} + \text{ClO} \rightarrow \text{Br} + \text{OClO}$                                                                                          | $1.6\text{E-}12*\text{EXP}(430./\text{temp})$                                                                                             | Atkinson et al. (2007)                                 |
| G7603b | StTrGBrCl | $\text{BrO} + \text{ClO} \rightarrow \text{Br} + \text{Cl} + \text{O}_2$                                                                               | $2.9\text{E-}12*\text{EXP}(220./\text{temp})$                                                                                             | Atkinson et al. (2007)                                 |
| G7603c | StTrGBrCl | $\text{BrO} + \text{ClO} \rightarrow \text{BrCl} + \text{O}_2$                                                                                         | $5.8\text{E-}13*\text{EXP}(170./\text{temp})$                                                                                             | Atkinson et al. (2007)                                 |
| G7604  | TrGBrCl   | $\text{BrCl} + \text{Cl} \rightarrow \text{Br} + \text{Cl}_2$                                                                                          | $1.45\text{E-}11$                                                                                                                         | Clyne and Cruse (1972)                                 |
| G7605  | TrGBrCl   | $\text{CHCl}_2\text{Br} + \text{OH} \rightarrow \text{LCARBON} + 2 \text{ Cl} + \text{H}_2\text{O} + \text{Br}$                                        | $2.0\text{E-}12*\text{EXP}(-840./\text{temp})$                                                                                            | see note*                                              |
| G7606  | TrGBrCl   | $\text{CHClBr}_2 + \text{OH} \rightarrow \text{LCARBON} + \text{Cl} + \text{H}_2\text{O} + 2 \text{ Br}$                                               | $2.0\text{E-}12*\text{EXP}(-840./\text{temp})$                                                                                            | see note*                                              |
| G7607  | TrGBrCl   | $\text{CH}_2\text{ClBr} + \text{OH} \rightarrow \text{LCARBON} + \text{Cl} + \text{H}_2\text{O} + \text{Br}$                                           | $2.1\text{E-}12*\text{EXP}(-880./\text{temp})$                                                                                            | Burkholder et al. (2015)*                              |
| G9200a | StTrGS    | $\text{SO}_2 + \text{OH} \rightarrow \text{SO}_3 + \text{HO}_2$                                                                                        | $k_{\text{3rd}}(\text{temp}, \text{cair}, 3.3\text{E-}31, 4.3, 1.6\text{E-}12, 0., 0.6)$                                                  | Sander et al. (2011)                                   |
| G9400a | TrGCS     | $\text{DMS} + \text{OH} \rightarrow \text{CH}_3\text{SO}_2 + \text{HCHO}$                                                                              | $1.13\text{E-}11*\text{EXP}(-253./\text{temp})$                                                                                           | Atkinson et al. (2004)*                                |
| G9400b | TrGCS     | $\text{DMS} + \text{OH} \rightarrow \text{DMSO} + \text{HO}_2$                                                                                         | $k_{\text{DMS\_OH}}$                                                                                                                      | Atkinson et al. (2004)*                                |
| G9401  | TrGCNS    | $\text{DMS} + \text{NO}_3 \rightarrow \text{CH}_3\text{SO}_2 + \text{HNO}_3 + \text{HCHO}$                                                             | $1.9\text{E-}13*\text{EXP}(520./\text{temp})$                                                                                             | Atkinson et al. (2004)                                 |
| G9402  | TrGCS     | $\text{DMSO} + \text{OH} \rightarrow .6 \text{ SO}_2 + \text{HCHO} + .6 \text{ CH}_3\text{O}_2 + .4 \text{ HO}_2 + .4 \text{ CH}_3\text{SO}_3\text{H}$ | $1\text{E-}10$                                                                                                                            | Hynes and Wine (1996)                                  |
| G9403  | TrGS      | $\text{CH}_3\text{SO}_2 \rightarrow \text{SO}_2 + \text{CH}_3\text{O}_2$                                                                               | $1.8\text{E}13*\text{EXP}(-8661./\text{temp})$                                                                                            | Barone et al. (1995)                                   |
| G9404  | TrGS      | $\text{CH}_3\text{SO}_2 + \text{O}_3 \rightarrow \text{CH}_3\text{SO}_3$                                                                               | $3\text{E-}13$                                                                                                                            | Barone et al. (1995)                                   |

Table S1: Gas phase reactions (... continued)

| #         | labels  | reaction                                                                                                                                                                                           | rate coefficient                                                                                               | reference                                                           |
|-----------|---------|----------------------------------------------------------------------------------------------------------------------------------------------------------------------------------------------------|----------------------------------------------------------------------------------------------------------------|---------------------------------------------------------------------|
| G9405     | TrGS    | $\text{CH}_3\text{SO}_3 + \text{HO}_2 \rightarrow \text{CH}_3\text{SO}_3\text{H}$                                                                                                                  | 5.E-11                                                                                                         | Barone et al. (1995)                                                |
| G9600     | TrGCClS | $\text{DMS} + \text{Cl} \rightarrow \text{CH}_3\text{SO}_2 + \text{HCl} + \text{HCHO}$                                                                                                             | 3.3E-10                                                                                                        | Atkinson et al. (2004)                                              |
| G9700     | TrGBrCS | $\text{DMS} + \text{Br} \rightarrow \text{CH}_3\text{SO}_2 + \text{HBr} + \text{HCHO}$                                                                                                             | $9.\text{E}-11 \cdot \text{EXP}(-2386./\text{temp})$                                                           | Jefferson et al. (1994)                                             |
| G9701     | TrGBrCS | $\text{DMS} + \text{BrO} \rightarrow \text{DMSO} + \text{Br}$                                                                                                                                      | 4.4E-13                                                                                                        | Ingham et al. (1999)                                                |
| G01Diag   | StTrG   | $\text{O}_3(\text{s}) \rightarrow \text{LO}_3(\text{s})$                                                                                                                                           | k_03s                                                                                                          | Roelofs and Lelieveld (1997)                                        |
| G42085abS | TrGCN   | $\text{CH}_3\text{CN} + \text{OH} \rightarrow \text{OH}$                                                                                                                                           | $8.1\text{E}-13 \cdot \text{EXP}(-1080./\text{temp})$                                                          | Atkinson et al. (2006), Tyndall et al. (2001b)                      |
| G42086bcS | TrGCN   | $\text{CH}_3\text{CN} + \text{O}(^1\text{D}) \rightarrow \text{O}(^1\text{D})$                                                                                                                     | $2.54\text{E}-10 \cdot \text{EXP}(-24./\text{temp})$<br>$\cdot (1.-0.0269 \cdot \text{EXP}(137./\text{temp}))$ | Strekowski et al. (2010)                                            |
| G6416S    | TrGCClN | $\text{Cl} + \text{CH}_3\text{CN} \rightarrow \text{Cl}$                                                                                                                                           | $1.6\text{E}-11 \cdot \text{EXP}(-2104./\text{temp})$                                                          | Tyndall et al. (1996), Tyndall et al. (2001b), Sander et al. (2019) |
| G6500dc01 | StGClF  | $\text{CHF}_2\text{Cl} + \text{O}(^1\text{D}) \rightarrow 0.55 \text{ ClO} + 0.05 \text{ OH} + 0.28 \text{ O}(^3\text{P}) + 0.28 \text{ CHF}_2\text{Cl} + 0.72 \text{ L CARBON} + 0.17 \text{ Cl}$ | 1.0E-10                                                                                                        | Sander et al. (2011)                                                |
| G6500dc02 | StG     | $\text{CHF}_2\text{Cl} + \text{OH} \rightarrow \text{L CARBON} + \text{H}_2\text{O}$                                                                                                               | $1.05\text{e}-12 \cdot \text{EXP}(-1600./\text{temp})$                                                         | Sander et al. (2011)                                                |
| G6500dc03 | StG     | $\text{CHF}_2\text{Cl} + \text{Cl} \rightarrow \text{HCl} + \text{L CARBON}$                                                                                                                       | $1.05\text{e}-12 \cdot \text{EXP}(-2430./\text{temp})$                                                         | Sander et al. (2011)                                                |
| G5300dc01 | StGCF   | $\text{CH}_2\text{FCF}_3 + \text{O}(^1\text{D}) \rightarrow 0.65 \text{ O}(^3\text{P}) + 0.65 \text{ CH}_2\text{FCF}_3 + 0.24 \text{ OH} + 0.70 \text{ L CARBON}$                                  | 4.9E-11                                                                                                        | Sander et al. (2011)*                                               |
| G5300dc02 | StG     | $\text{CH}_2\text{FCF}_3 + \text{OH} \rightarrow 2 \text{ L CARBON} + \text{H}_2\text{O}$                                                                                                          | $1.05\text{e}-12 \cdot \text{EXP}(-1630./\text{temp})$                                                         | Sander et al. (2011)                                                |
| G5300dc03 | StG     | $\text{CH}_2\text{FCF}_3 + \text{Cl} \rightarrow \text{HCl} + 2 \text{ L CARBON}$                                                                                                                  | $2.4\text{e}-12 \cdot \text{EXP}(-2200./\text{temp})$                                                          | Sander et al. (2011)                                                |
| G6500dc04 | StG     | $\text{CF}_2\text{ClCFCl}_2 + \text{O}(^1\text{D}) \rightarrow 0.2 \text{ O}(^3\text{P}) + 0.2 \text{ CF}_2\text{ClCFCl}_2 + 0.8 \text{ ClO} + 1.6 \text{ L CARBON} + 1.6 \text{ Cl}$              | 2.0E-10                                                                                                        | Sander et al. (2011)                                                |
| G6400dc01 | StG     | $\text{CH}_2\text{Cl}_2 + \text{OH} \rightarrow \text{L CARBON} + \text{H}_2\text{O}$                                                                                                              | $1.09\text{e}-12 \cdot \text{EXP}(-870./\text{temp})$                                                          | Sander et al. (2011)                                                |
| G6400dc02 | StG     | $\text{CH}_2\text{Cl}_2 + \text{Cl} \rightarrow \text{L CARBON} + \text{HCl}$                                                                                                                      | $.4\text{e}-12 \cdot \text{EXP}(-910./\text{temp})$                                                            | Sander et al. (2011)                                                |
| G5300dc04 | StG     | $\text{CHF}_3 + \text{O}(^1\text{D}) \rightarrow 0.77 \text{ O}(^3\text{P}) + 0.77 \text{ CHF}_3 + 0.23 \text{ L CARBON}$                                                                          | 9.1E-12                                                                                                        | Sander et al. (2011)*                                               |
| G5300dc05 | StG     | $\text{CHF}_3 + \text{OH} \rightarrow \text{L CARBON} + \text{H}_2\text{O}$                                                                                                                        | $5.2\text{e}-13 \cdot \text{EXP}(-2210./\text{temp})$                                                          | Sander et al. (2011)                                                |
| G6500dc05 | StG     | $\text{CH}_3\text{CFCl}_2 + \text{O}(^1\text{D}) \rightarrow 0.31 \text{ O}(^3\text{P}) + 0.31 \text{ CH}_3\text{CFCl}_2 + 0.69 \text{ L CARBON} + 0.69 \text{ Cl}$                                | 2.6E-10                                                                                                        | Sander et al. (2011)*                                               |
| G6500dc06 | StG     | $\text{CH}_3\text{CFCl}_2 + \text{OH} \rightarrow \text{H}_2\text{O} + 2 \text{ L CARBON}$                                                                                                         | $1.25\text{e}-12 \cdot \text{EXP}(-1600./\text{temp})$                                                         | Sander et al. (2011)                                                |
| G6500dc07 | StG     | $\text{CH}_3\text{CFCl}_2 + \text{Cl} \rightarrow \text{HCl} + 2 \text{ L CARBON}$                                                                                                                 | $3.4\text{e}-12 \cdot \text{EXP}(-2200./\text{temp})$                                                          | Sander et al. (2011)                                                |
| G6500dc08 | StG     | $\text{CF}_2\text{ClCF}_2\text{Cl} + \text{O}(^1\text{D}) \rightarrow 0.25 \text{ O}(^3\text{P}) + 0.25 \text{ CF}_2\text{ClCF}_2\text{Cl} + 0.75 \text{ L CARBON}$                                | 1.3E-10                                                                                                        | Sander et al. (2011)                                                |
| G5300dc06 | StG     | $\text{CHF}_2\text{CF}_3 + \text{O}(^1\text{D}) \rightarrow 0.24 \text{ O}(^3\text{P}) + 0.24 \text{ CHF}_2\text{CF}_3 + 0.6 \text{ OH} + 1.52 \text{ L CARBON}$                                   | 1.2E-10                                                                                                        | Sander et al. (2011)*                                               |

Table S1: Gas phase reactions (... continued)

| #         | labels | reaction                                                                                                                                                  | rate coefficient                                                                     | reference             |
|-----------|--------|-----------------------------------------------------------------------------------------------------------------------------------------------------------|--------------------------------------------------------------------------------------|-----------------------|
| G5300dc07 | StG    | $\text{CHF}_2\text{CF}_3 + \text{OH} \rightarrow \text{H}_2\text{O} + 2 \text{LCARBON}$                                                                   | $6.0\text{e-}13 \cdot \text{EXP}(-1700./\text{temp})$                                | Sander et al. (2011)  |
| G6500dc09 | StG    | $\text{CHF}_2\text{CF}_3 + \text{Cl} \rightarrow \text{HCl} + 2 \text{LCARBON}$                                                                           | $1.8\text{e-}12 \cdot \text{EXP}(-2600./\text{temp})$                                | Sander et al. (2011)  |
| G5300dc08 | StG    | $\text{CH}_3\text{CF}_3 + \text{O}(^1\text{D}) \rightarrow 0.18 \text{O}(^3\text{P}) + 0.18 \text{CH}_3\text{CF}_3 + 0.38 \text{OH} + 0.8 \text{LCARBON}$ | $4.4\text{E-}11$                                                                     | Sander et al. (2011)* |
| G5300dc09 | StG    | $\text{CH}_3\text{CF}_3 + \text{OH} \rightarrow \text{H}_2\text{O} + 2 \text{LCARBON}$                                                                    | $1.1\text{e-}12 \cdot \text{EXP}(-2010./\text{temp})$                                | Sander et al. (2011)  |
| G6500dc10 | StG    | $\text{CH}_3\text{CF}_3 + \text{Cl} \rightarrow \text{HCl} + 2 \text{LCARBON}$                                                                            | $1.44\text{e-}11 \cdot \text{EXP}(-3940./\text{temp})$                               | Sander et al. (2011)  |
| G6400dc03 | StG    | $\text{CHCl}_3 + \text{OH} \rightarrow \text{H}_2\text{O} + \text{LCARBON} + 3 \text{Cl}$                                                                 | $2.2\text{e-}12 \cdot \text{EXP}(-920./\text{temp})$                                 | Sander et al. (2011)  |
| G6400dc04 | StG    | $\text{CHCl}_3 + \text{Cl} \rightarrow \text{HCl} + \text{LCARBON} + 3 \text{Cl}$                                                                         | $3.31\text{e-}12 \cdot \text{EXP}(-990./\text{temp})$                                | Sander et al. (2011)  |
| G6500dc11 | StG    | $\text{CF}_3\text{CF}_2\text{Cl} + \text{O}(^1\text{D}) \rightarrow 0.7 \text{O}(^3\text{P}) + 0.7 \text{CF}_3\text{CF}_2\text{Cl} + 0.6 \text{LCARBON}$  | $5.0\text{E-}11$                                                                     | Sander et al. (2011)  |
| G5300dc10 | StG    | $\text{CH}_2\text{F}_2 + \text{O}(^1\text{D}) \rightarrow 0.7 \text{O}(^3\text{P}) + 0.7 \text{CH}_2\text{F}_2 + 0.3 \text{LCARBON}$                      | $5.1\text{e-}11$                                                                     | Sander et al. (2011)  |
| G5300dc11 | StG    | $\text{CH}_2\text{F}_2 + \text{OH} \rightarrow \text{H}_2\text{O} + \text{LCARBON}$                                                                       | $1.7\text{e-}12 \cdot \text{EXP}(-1500./\text{temp})$                                | Sander et al. (2011)  |
| G5300dc12 | StG    | $\text{CH}_3\text{CHF}_2 + \text{O}(^1\text{D}) \rightarrow 0.34 \text{O}(^1\text{D}) + 0.34 \text{CH}_3\text{CHF}_2 + 0.15 \text{OH} + \text{LCARBON}$   | $1.75\text{e-}10$                                                                    | Sander et al. (2011)  |
| G5300dc13 | StG    | $\text{CH}_3\text{CHF}_2 + \text{OH} \rightarrow 2 \text{LCARBON}$                                                                                        | $8.7\text{e-}13 \cdot \text{EXP}(-975./\text{temp})$                                 | Sander et al. (2011)  |
| G6500dc12 | StG    | $\text{CH}_3\text{CHF}_2 + \text{Cl} \rightarrow \text{HCl} + 2 \text{LCARBON}$                                                                           | $6.0\text{e-}12 \cdot \text{EXP}(-960./\text{temp})$                                 | Sander et al. (2011)  |
| G9100     | TrStGS | $\text{SO} + \text{O}_2 \rightarrow \text{SO}_2 + \text{O}(^3\text{P})$                                                                                   | $1.25\text{e-}13 \cdot \text{exp}(-2190/\text{temp})$                                | Sander et al. (2011)  |
| G9101     | TrStGS | $\text{SO} + \text{O}_3 \rightarrow \text{SO}_2 + \text{O}_2$                                                                                             | $3.4\text{e-}12 \cdot \text{exp}(-1100/\text{temp})$                                 | Sander et al. (2011)  |
| G9102     | TrStGS | $\text{S} + \text{O}_2 \rightarrow \text{SO} + \text{O}(^3\text{P})$                                                                                      | $2.3\text{e-}12$                                                                     | Sander et al. (2011)  |
| G9201     | TrStGS | $\text{SH} + \text{O}_2 \rightarrow \text{OH} + \text{SO}$                                                                                                | $4.\text{e-}19$                                                                      | Sander et al. (2011)  |
| G9202     | TrStGS | $\text{SO}_3 + \text{H}_2\text{O} \rightarrow \text{H}_2\text{SO}_4$                                                                                      | $8.5\text{e-}41 \cdot \text{exp}(6540./\text{temp}) \cdot \text{C}(\text{ind\_H2O})$ | Sander et al. (2003)  |
| G9406     | TrStGS | $\text{OCS} + \text{OH} \rightarrow \text{SH} + \text{CO}_2$                                                                                              | $1.1\text{e-}13 \cdot \text{exp}(-1200./\text{temp})$                                | Sander et al. (2011)  |
| G9407     | TrStGS | $\text{OCS} + \text{O}(^3\text{P}) \rightarrow \text{CO} + \text{SO}$                                                                                     | $2.1\text{e-}11 \cdot \text{exp}(-2200./\text{temp})$                                | Sander et al. (2011)  |

## General notes

### Three-body reactions

Rate coefficients for three-body reactions are defined via the function **k\_3rd**( $T, M, k_0^{300}, n, k_{\text{inf}}^{300}, m, f_c$ ). In the code, the temperature  $T$  is called **temp** and the concentration of “air molecules”  $M$  is called **cair**. Using the auxiliary variables  $k_0(T)$ ,  $k_{\text{inf}}(T)$ , and  $k_{\text{ratio}}$ , **k\_3rd** is defined as:

$$k_0(T) = k_0^{300} \times \left(\frac{300\text{K}}{T}\right)^n \quad (1)$$

$$k_{\text{inf}}(T) = k_{\text{inf}}^{300} \times \left(\frac{300\text{K}}{T}\right)^m \quad (2)$$

$$k_{\text{ratio}} = \frac{k_0(T)M}{k_{\text{inf}}(T)} \quad (3)$$

$$\mathbf{k\_3rd} = \frac{k_0(T)M}{1 + k_{\text{ratio}}} \times f_c^{\left(\frac{1}{1 + (\log_{10}(k_{\text{ratio}}))^2}\right)} \quad (4)$$

A similar function, called **k\_3rd\_iupac** here, is used by Wallington et al. (2018) for three-body reactions. It has the same function parameters as **k\_3rd** and it is defined as:

$$k_0(T) = k_0^{300} \times \left(\frac{300\text{K}}{T}\right)^n \quad (5)$$

$$k_{\text{inf}}(T) = k_{\text{inf}}^{300} \times \left(\frac{300\text{K}}{T}\right)^m \quad (6)$$

$$k_{\text{ratio}} = \frac{k_0(T)M}{k_{\text{inf}}(T)} \quad (7)$$

$$N = 0.75 - 1.27 \times \log_{10}(f_c) \quad (8)$$

$$\mathbf{k\_3rd\_iupac} = \frac{k_0(T)M}{1 + k_{\text{ratio}}} \times f_c^{\left(\frac{1}{1 + (\log_{10}(k_{\text{ratio}})/N)^2}\right)} \quad (9)$$

## Structure-Activity Relationships (SAR)

Some unmeasured rate coefficients are estimated with structure-activity relationships, using the following parameters and substituent factors:

| $k$ for H-abstraction by OH in $\text{cm}^{-3}\text{s}^{-1}$ |                                                                     |
|--------------------------------------------------------------|---------------------------------------------------------------------|
| <b>k_p</b>                                                   | $4.49 \times 10^{-18} \times (T/\text{K})^2 \exp(-320 \text{ K}/T)$ |
| <b>k_s</b>                                                   | $4.50 \times 10^{-18} \times (T/\text{K})^2 \exp(253 \text{ K}/T)$  |
| <b>k_t</b>                                                   | $2.12 \times 10^{-18} \times (T/\text{K})^2 \exp(696 \text{ K}/T)$  |
| <b>k_ROHRO</b>                                               | $2.1 \times 10^{-18} \times (T/\text{K})^2 \exp(-85 \text{ K}/T)$   |
| <b>k_CO2H</b>                                                | $0.7 \times k_{\text{CH}_3\text{CO}_2\text{H}+\text{OH}}$           |
| <b>k_ROOHRO</b>                                              | $0.6 \times k_{\text{CH}_3\text{OOH}+\text{OH}}$                    |
| <b>f_alk</b>                                                 | 1.23                                                                |
| <b>f_sOH</b>                                                 | 3.44                                                                |
| <b>f_tOH</b>                                                 | 2.68                                                                |
| <b>f_sOOH</b>                                                | 8.                                                                  |
| <b>f_tOOH</b>                                                | 8.                                                                  |
| <b>f_ONO2</b>                                                | 0.04                                                                |
| <b>f_CH2ONO2</b>                                             | 0.20                                                                |
| <b>f_cpan</b>                                                | 0.25                                                                |
| <b>f_allyl</b>                                               | 3.6                                                                 |
| <b>f_CHO</b>                                                 | 0.55                                                                |
| <b>f_CO2H</b>                                                | 1.67                                                                |
| <b>f_CO</b>                                                  | 0.73                                                                |
| <b>f_O</b>                                                   | 8.15                                                                |
| <b>f_pCH2OH</b>                                              | 1.29                                                                |
| <b>f_tCH2OH</b>                                              | 0.53                                                                |

| $k$ for OH-addition to double bonds in $\text{cm}^{-3}\text{s}^{-1}$ |                                                                                                                    |
|----------------------------------------------------------------------|--------------------------------------------------------------------------------------------------------------------|
| <b>k_adp</b>                                                         | $4.5 \times 10^{-12} \times (T/300 \text{ K})^{-0.85}$                                                             |
| <b>k_ads</b>                                                         | $1/4 \times (1.1 \times 10^{-11} \times \exp(485 \text{ K}/T) + 1.0 \times 10^{-11} \times \exp(553 \text{ K}/T))$ |
| <b>k_adt</b>                                                         | $1.922 \times 10^{-11} \times \exp(450 \text{ K}/T) - k_{\text{ads}}$                                              |
| <b>k_adsecprim</b>                                                   | $3.0 \times 10^{-11}$                                                                                              |
| <b>k_adtertprim</b>                                                  | $5.7 \times 10^{-11}$                                                                                              |
| <b>a_PAN</b>                                                         | 0.56                                                                                                               |
| <b>a_CHO</b>                                                         | 0.31                                                                                                               |
| <b>a_COCH3</b>                                                       | 0.76                                                                                                               |
| <b>a_CH2OH</b>                                                       | 1.7                                                                                                                |
| <b>a_CH2OOH</b>                                                      | 1.7                                                                                                                |
| <b>a_COH</b>                                                         | 2.2                                                                                                                |
| <b>a_COOH</b>                                                        | 2.2                                                                                                                |
| <b>a_CO2H</b>                                                        | 0.25                                                                                                               |
| <b>a_CH2ONO2</b>                                                     | 0.64                                                                                                               |

## RO<sub>2</sub> self and cross reactions

The self and cross reactions of organic peroxy radicals are treated according to the permutation reaction formalism as implemented in the MCM (Rickard and Pascoe, 2009), as described by Jenkin et al. (1997). Every organic peroxy radical reacts in a pseudo-first-order reaction with a rate constant that is expressed as  $k^{\text{1st}} = 2 \times \sqrt{k_{\text{self}} \times \mathbf{k\_CH302}} \times [\text{RO}_2]$  where  $k_{\text{self}}$  = second-order rate coefficient of the self reaction of the organic peroxy radical, **k\_CH302** = second-order rate coefficient of the self reaction of  $\text{CH}_3\text{O}_2$ , and  $[\text{RO}_2]$  = sum of the concentrations of all organic peroxy radicals.

## Specific notes

G1002a: The path leading to  $2\text{O}(^3\text{P}) + \text{O}_2$  results in a null cycle regarding odd oxygen and is neglected.

G2110: The rate coefficient is:  $k_{\text{H02\_H02}} = (3.0\text{E-}13 * \text{EXP}(460./\text{temp}) + 2.1\text{E-}33 * \text{EXP}(920./\text{temp}) * \text{cair}) * (1. + 1.4\text{E-}21 * \text{EXP}(2200./\text{temp}) * \text{C}(\text{ind\_H20}))$ .

G3109: The rate coefficient is:  $k_{\text{N03\_N02}} = k_{\text{3rd}}(\text{temp}, \text{cair}, 2.4\text{E-}30, 3.0, 1.6\text{E-}12, -0.1, 0.6)$ .

G3110: The rate coefficient is defined as backward reaction divided by equilibrium constant.

G3203: The rate coefficient is:  $k_{\text{N02\_H02}} = k_{\text{3rd}}(\text{temp}, \text{cair}, 1.9\text{E-}31, 3.4, 4.0\text{E-}12, 0.3, 0.6)$ .

G3206: The rate coefficient is:  $k_{\text{HN03\_OH}} = 1.32\text{E-}14 * \text{EXP}(527/\text{temp}) + 1 / (1 / (7.39\text{E-}32 * \text{EXP}(453/\text{temp}) * \text{cair}) + 1 / (9.73\text{E-}17 * \text{EXP}(1910/\text{temp})))$

G3207: The rate coefficient is defined as backward reaction divided by equilibrium constant.

G4103: Sander et al. (2006) recommend a zero product yield for HCHO.

G4109: The same temperature dependence assumed as for  $\text{CH}_3\text{CHO} + \text{NO}_3$ . At 298 K,  $k = 5.8 \times 10^{-16}$ .

G4201: The product distribution is from Rickard and Pascoe (2009), after substitution of the Criegee intermediate by its decomposition products.

G4206: The product  $\text{C}_2\text{H}_5\text{OH}$ , which reacts only with OH, is substituted by its degradation products  $\approx 0.1 \text{HOCH}_2\text{CH}_2\text{O}_2 + 0.9 \text{CH}_3\text{CHO} + 0.9 \text{HO}_2$ .

G4207: Same value as for G4107

G4213: The rate coefficient is:  $k_{\text{CH3C03\_N02}} = k_{\text{3rd}}(\text{temp}, \text{cair}, 9.7\text{E-}29, 5.6, 9.3\text{E-}12, 1.5, 0.6)$ .

G4221: The rate coefficient  $\text{isk\_PAN\_M} = k_{\text{CH3C03\_N02}} / 9.5\text{E-}29 * \text{EXP}(-14000./\text{temp})$ , i.e. the rate coefficient is defined as backward reaction divided by equilibrium constant.

G4307: Same value as for G4107

G4315: Same value as for G4107

G4401: Same value as for G4306

G4402: Same value as for G4304

G4403: Same value as for G4305

G4404: Same value as for G4107

G4414: Same value as for G4304

G4415: Same value as for G4305

G4416: Same value as for G4107

G4419: Same value as for G4221

G6103: The rate coefficient is defined as backward reaction divided by equilibrium constant.

G6204: At low temperatures, there may be a minor reaction channel leading to  $\text{O}_3 + \text{HCl}$ . See Finkbeiner et al. (1995) for details. It is neglected here.

G6402: The initial products are probably HCl and  $\text{CH}_2\text{OOH}$  (Atkinson et al., 2006). It is assumed that  $\text{CH}_2\text{OOH}$  dissociates into HCHO and OH.

G6405: Sander et al. (2006), but simplified shortcut to release all Cl

G7302: The rate coefficient is:  $k_{\text{Br0\_N02}} = k_{\text{3rd}}(\text{temp}, \text{cair}, 5.2\text{E-}31, 3.2, 6.9\text{E-}12, 2.9, 0.6)$ .

G7303: The rate coefficient is defined as backward reaction (Atkinson et al., 2007) divided by equilibrium constant (Orlando and Tyndall, 1996).

G7407: It is assumed that the reaction liberates all Br atoms. The fate of the carbon atom is currently not considered.

G7408: It is assumed that the reaction liberates all Br atoms. The fate of the carbon atom is currently not considered.

G7605: Same value as for G7408:  $\text{CH}_2\text{Br}_2 + \text{OH}$  assumed. It is assumed that the reaction liberates all

Br and all Cl. The fate of the carbon atom is currently not considered.

G7606: Same value as for G7408:  $\text{CH}_2\text{Br}_2 + \text{OH}$  assumed. It is assumed that the reaction liberates all Br atoms and also Cl. The fate of the carbon atom is currently not considered.

G7607: It is assumed that the reaction liberates all Br atoms and also Cl. The fate of the carbon atom is currently not considered.

G9400a: For the abstraction path, the assumed reaction sequence (omitting  $\text{H}_2\text{O}$  and  $\text{O}_2$  as products) according to Yin et al. (1990) is:

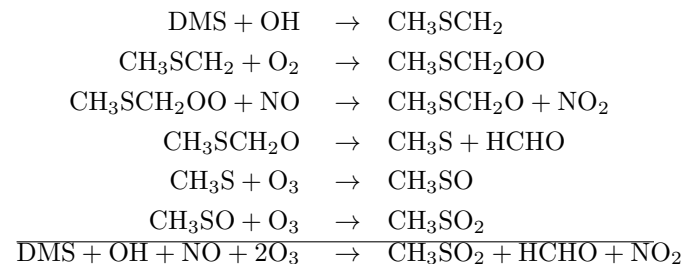

Neglecting the effect on  $\text{O}_3$  and  $\text{NO}_x$ , the remaining reaction is:

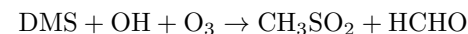

G9400b: For the addition path, the rate coefficient is:  $k_{\text{DMS\_OH}} = 1.0\text{E-}39 * \text{EXP}(5820./\text{temp}) * \text{C}(\text{ind\_02}) / (1. + 5.0\text{E-}30 * \text{EXP}(6280./\text{temp}) * \text{C}(\text{ind\_02}))$ .

G5300dc01: Kono and Matsumi 2001

G5300dc04: force and wiesenfeld 1981

G6500dc05: physical quenching ( $\text{O1D-}\dot{\text{O}}\text{3P}$ ) Warren 1991

G5300dc06: Kono and Matsumi

G5300dc08: Kono and Matsumi

Table S2: Photolysis reactions

| #       | labels    | reaction                                                                              | rate coefficient  | reference                   |
|---------|-----------|---------------------------------------------------------------------------------------|-------------------|-----------------------------|
| J (gas) |           |                                                                                       |                   |                             |
| J1000a  | UpStTrGJ  | $O_2 + h\nu \rightarrow O(^3P) + O(^3P)$                                              | jx(ip_02)         | Sander et al. (2014)        |
| J1001a  | UpStTrGJ  | $O_3 + h\nu \rightarrow O(^1D) + O_2$                                                 | jx(ip_01D)        | Sander et al. (2014)        |
| J1001b  | UpStTrGJ  | $O_3 + h\nu \rightarrow O(^3P) + O_2$                                                 | jx(ip_03P)        | Sander et al. (2014)        |
| J2100a  | UpStGJ    | $H_2O + h\nu \rightarrow H + OH$                                                      | jx(ip_H2O)        | Sander et al. (2014)        |
| J2101   | UpStTrGJ  | $H_2O_2 + h\nu \rightarrow 2 OH$                                                      | jx(ip_H2O2)       | Sander et al. (2014)        |
| J3100   | UpStGJN   | $N_2O + h\nu \rightarrow O(^1D) + N_2$                                                | jx(ip_N2O)        | Sander et al. (2014)        |
| J3101   | UpStTrGJN | $NO_2 + h\nu \rightarrow NO + O(^3P)$                                                 | jx(ip_N02)        | Sander et al. (2014)        |
| J3102a  | UpStGJN   | $NO + h\nu \rightarrow N + O(^3P)$                                                    | jx(ip_NO)         | Sander et al. (2014)        |
| J3103a  | UpStTrGJN | $NO_3 + h\nu \rightarrow NO_2 + O(^3P)$                                               | jx(ip_N020)       | Sander et al. (2014)        |
| J3103b  | UpStTrGJN | $NO_3 + h\nu \rightarrow NO + O_2$                                                    | jx(ip_N002)       | Sander et al. (2014)        |
| J3104   | StTrGJN   | $N_2O_5 + h\nu \rightarrow NO_2 + NO_3$                                               | jx(ip_N205)       | Sander et al. (2014)        |
| J3200   | TrGJN     | $HONO + h\nu \rightarrow NO + OH$                                                     | jx(ip_HONO)       | Sander et al. (2014)        |
| J3201   | StTrGJN   | $HNO_3 + h\nu \rightarrow NO_2 + OH$                                                  | jx(ip_HNO3)       | Sander et al. (2014)        |
| J3202   | StTrGJN   | $HNO_4 + h\nu \rightarrow .667 NO_2 + .667 HO_2 + .333 NO_3 + .333 OH$                | jx(ip_HNO4)       | Sander et al. (2014)        |
| J4100   | StTrGJ    | $CH_3OOH + h\nu \rightarrow HCHO + OH + HO_2$                                         | jx(ip_CH300H)     | Sander et al. (2014)        |
| J4101a  | StTrGJ    | $HCHO + h\nu \rightarrow H_2 + CO$                                                    | jx(ip_COH2)       | Sander et al. (2014)        |
| J4101b  | StTrGJ    | $HCHO + h\nu \rightarrow H + CO + HO_2$                                               | jx(ip_CHOH)       | Sander et al. (2014)        |
| J4102   | StGJ      | $CO_2 + h\nu \rightarrow CO + O(^3P)$                                                 | jx(ip_CO2)        | Sander et al. (2014)        |
| J4103   | StGJ      | $CH_4 + h\nu \rightarrow CO + 0.31 H + 0.69 H_2 + 1.155 H_2O$                         | jx(ip_CH4)        | Sander et al. (2014)        |
| J4200   | TrGJC     | $C_2H_5OOH + h\nu \rightarrow CH_3CHO + HO_2 + OH$                                    | jx(ip_CH300H)     | von Kuhlmann (2001)         |
| J4201   | TrGJC     | $CH_3CHO + h\nu \rightarrow CH_3O_2 + HO_2 + CO$                                      | jx(ip_CH3CHO)     | Sander et al. (2014)        |
| J4202   | TrGJC     | $CH_3C(O)OOH + h\nu \rightarrow CH_3O_2 + OH + CO_2$                                  | jx(ip_CH3C03H)    | Sander et al. (2014)        |
| J4203   | TrGJCN    | $NACA + h\nu \rightarrow NO_2 + HCHO + CO$                                            | 0.19*jx(ip_CHOH)  | von Kuhlmann (2001)         |
| J4204   | TrGJCN    | $PAN + h\nu \rightarrow CH_3C(O)OO + NO_2$                                            | jx(ip_PAN)        | Sander et al. (2014)        |
| J4300   | TrGJC     | $iC_3H_7OOH + h\nu \rightarrow CH_3COCH_3 + HO_2 + OH$                                | jx(ip_CH300H)     | von Kuhlmann (2001)         |
| J4301   | TrGJC     | $CH_3COCH_3 + h\nu \rightarrow CH_3C(O)OO + CH_3O_2$                                  | jx(ip_CH3C0CH3)   | Sander et al. (2014)        |
| J4302   | TrGJC     | $CH_3COCH_2OH + h\nu \rightarrow CH_3C(O)OO + HCHO + HO_2$                            | 0.074*jx(ip_CHOH) | see note*                   |
| J4303   | TrGJC     | $MGLYOX + h\nu \rightarrow CH_3C(O)OO + CO + HO_2$                                    | jx(ip_MGLYOX)     | Sander et al. (2014)        |
| J4304   | TrGJC     | $CH_3COCH_2O_2H + h\nu \rightarrow CH_3C(O)OO + HCHO + OH$                            | jx(ip_CH300H)     | see note*                   |
| J4306   | TrGJCN    | $iC_3H_7ONO_2 + h\nu \rightarrow CH_3COCH_3 + NO_2 + HO_2$                            | 3.7*jx(ip_PAN)    | von Kuhlmann et al. (2003)* |
| J4400   | TrGJC     | $LC_4H_9OOH + h\nu \rightarrow OH + .67 MEK + .67 HO_2 + .33 C_2H_5O_2 + .33 CH_3CHO$ | jx(ip_CH300H)     | Rickard and Pascoe (2009)   |

Table S2: Photolysis reactions (... continued)

| #      | labels    | reaction                                                                                                                                                                                                       | rate coefficient                                                                    | reference                  |
|--------|-----------|----------------------------------------------------------------------------------------------------------------------------------------------------------------------------------------------------------------|-------------------------------------------------------------------------------------|----------------------------|
| J4401  | TrGJC     | $\text{MVK} + h\nu \rightarrow \text{CH}_3\text{C}(\text{O})\text{OO} + \text{HCHO} + \text{CO} + \text{HO}_2$                                                                                                 | $0.019 \cdot \text{jx}(\text{ip\_COH2}) + 0.015 \cdot \text{jx}(\text{ip\_MGLYOX})$ | Sander et al. (2014)       |
| J4402  | TrGJC     | $\text{MVKOOH} + h\nu \rightarrow \text{OH} + .5 \text{ MGLYOX} + .25 \text{ CH}_3\text{COCH}_2\text{OH} + .75 \text{ HCHO} + .75 \text{ HO}_2 + .25 \text{ CH}_3\text{C}(\text{O})\text{OO} + .25 \text{ CO}$ | $\text{jx}(\text{ip\_CH300H})$                                                      | see note*                  |
| J4403  | TrGJC     | $\text{MEK} + h\nu \rightarrow \text{CH}_3\text{C}(\text{O})\text{OO} + \text{C}_2\text{H}_5\text{O}_2$                                                                                                        | $0.42 \cdot \text{jx}(\text{ip\_CHOH})$                                             | von Kuhlmann et al. (2003) |
| J4404  | TrGJC     | $\text{LMEKOOH} + h\nu \rightarrow \text{CH}_3\text{C}(\text{O})\text{OO} + \text{CH}_3\text{CHO} + \text{OH}$                                                                                                 | $\text{jx}(\text{ip\_CH300H})$                                                      | Rickard and Pascoe (2009)  |
| J4405  | TrGJC     | $\text{BIACET} + h\nu \rightarrow 2 \text{ CH}_3\text{C}(\text{O})\text{OO}$                                                                                                                                   | $2.15 \cdot \text{jx}(\text{ip\_MGLYOX})$                                           | see note*                  |
| J4406  | TrGJCN    | $\text{LC4H9NO3} + h\nu \rightarrow \text{NO}_2 + .67 \text{ MEK} + .67 \text{ HO}_2 + .33 \text{ C}_2\text{H}_5\text{O}_2 + .33 \text{ CH}_3\text{CHO}$                                                       | $3.7 \cdot \text{jx}(\text{ip\_PAN})$                                               | von Kuhlmann (2001)        |
| J4407  | TrGJCN    | $\text{MPAN} + h\nu \rightarrow \text{CH}_3\text{COCH}_2\text{OH} + \text{NO}_2$                                                                                                                               | $\text{jx}(\text{ip\_PAN})$                                                         | see note*                  |
| J4500  | TrGJC     | $\text{ISOOH} + h\nu \rightarrow \text{MVK} + \text{HCHO} + \text{HO}_2 + \text{OH}$                                                                                                                           | $\text{jx}(\text{ip\_CH300H})$                                                      | see note*                  |
| J4501  | TrGJCN    | $\text{ISON} + h\nu \rightarrow \text{MVK} + \text{HCHO} + \text{NO}_2 + \text{HO}_2$                                                                                                                          | $3.7 \cdot \text{jx}(\text{ip\_PAN})$                                               | von Kuhlmann (2001)        |
| J6000  | StTrGJCl  | $\text{Cl}_2 + h\nu \rightarrow \text{Cl} + \text{Cl}$                                                                                                                                                         | $\text{jx}(\text{ip\_Cl2})$                                                         | Sander et al. (2014)       |
| J6100  | StTrGJCl  | $\text{Cl}_2\text{O}_2 + h\nu \rightarrow 2 \text{ Cl}$                                                                                                                                                        | $\text{jx}(\text{ip\_Cl2O2})$                                                       | Sander et al. (2014)       |
| J6101  | StTrGJCl  | $\text{OClO} + h\nu \rightarrow \text{ClO} + \text{O}(^3\text{P})$                                                                                                                                             | $\text{jx}(\text{ip\_OC10})$                                                        | Sander et al. (2014)       |
| J6200  | StGJCl    | $\text{HCl} + h\nu \rightarrow \text{Cl} + \text{H}$                                                                                                                                                           | $\text{jx}(\text{ip\_HCl})$                                                         | Sander et al. (2014)       |
| J6201  | StTrGJCl  | $\text{HOCl} + h\nu \rightarrow \text{OH} + \text{Cl}$                                                                                                                                                         | $\text{jx}(\text{ip\_HOC1})$                                                        | Sander et al. (2014)       |
| J6300  | TrGJClN   | $\text{ClNO}_2 + h\nu \rightarrow \text{Cl} + \text{NO}_2$                                                                                                                                                     | $\text{jx}(\text{ip\_ClNO2})$                                                       | Sander et al. (2014)       |
| J6301a | StTrGJClN | $\text{ClNO}_3 + h\nu \rightarrow \text{Cl} + \text{NO}_3$                                                                                                                                                     | $\text{jx}(\text{ip\_ClNO3})$                                                       | Sander et al. (2014)       |
| J6301b | StTrGJClN | $\text{ClNO}_3 + h\nu \rightarrow \text{ClO} + \text{NO}_2$                                                                                                                                                    | $\text{jx}(\text{ip\_ClON02})$                                                      | Sander et al. (2014)       |
| J6400  | StGJCl    | $\text{CH}_3\text{Cl} + h\nu \rightarrow \text{Cl} + \text{CH}_3\text{O}_2$                                                                                                                                    | $\text{jx}(\text{ip\_CH3Cl})$                                                       | Sander et al. (2014)       |
| J6401  | StGJCl    | $\text{CCl}_4 + h\nu \rightarrow \text{LCARBON} + 4 \text{ Cl}$                                                                                                                                                | $\text{jx}(\text{ip\_CC14})$                                                        | Sander et al. (2014)       |
| J6402  | StGJCCl   | $\text{CH}_3\text{CCl}_3 + h\nu \rightarrow 2 \text{ LCARBON} + 3 \text{ Cl}$                                                                                                                                  | $\text{jx}(\text{ip\_CH3CC13})$                                                     | Sander et al. (2014)       |
| J6500  | StGJClF   | $\text{CFCl}_3 + h\nu \rightarrow 3 \text{ Cl} + \text{LCARBON} + \text{LFLUORINE}$                                                                                                                            | $\text{jx}(\text{ip\_CFC13})$                                                       | Sander et al. (2014)       |
| J6501  | StGJClF   | $\text{CF}_2\text{Cl}_2 + h\nu \rightarrow 2 \text{ Cl} + \text{LCARBON} + 2 \text{ LFLUORINE}$                                                                                                                | $\text{jx}(\text{ip\_CF2Cl2})$                                                      | Sander et al. (2014)       |
| J7000  | StTrGJBr  | $\text{Br}_2 + h\nu \rightarrow \text{Br} + \text{Br}$                                                                                                                                                         | $\text{jx}(\text{ip\_Br2})$                                                         | Sander et al. (2014)       |
| J7100  | StTrGJBr  | $\text{BrO} + h\nu \rightarrow \text{Br} + \text{O}(^3\text{P})$                                                                                                                                               | $\text{jx}(\text{ip\_BrO})$                                                         | Sander et al. (2014)       |
| J7200  | StTrGJBr  | $\text{HOBr} + h\nu \rightarrow \text{Br} + \text{OH}$                                                                                                                                                         | $\text{jx}(\text{ip\_HOBr})$                                                        | Sander et al. (2014)       |
| J7300  | TrGJBrN   | $\text{BrNO}_2 + h\nu \rightarrow \text{Br} + \text{NO}_2$                                                                                                                                                     | $\text{jx}(\text{ip\_BrNO2})$                                                       | Sander et al. (2014)       |
| J7301  | StTrGJBrN | $\text{BrNO}_3 + h\nu \rightarrow .85 \text{ Br} + .85 \text{ NO}_3 + .15 \text{ BrO} + .15 \text{ NO}_2$                                                                                                      | $\text{jx}(\text{ip\_BrNO3})$                                                       | Sander et al. (2014)*      |
| J7400  | StGJBr    | $\text{CH}_3\text{Br} + h\nu \rightarrow \text{Br} + \text{CH}_3\text{O}_2$                                                                                                                                    | $\text{jx}(\text{ip\_CH3Br})$                                                       | Sander et al. (2014)       |
| J7401  | TrGJBr    | $\text{CH}_2\text{Br}_2 + h\nu \rightarrow \text{LCARBON} + 2 \text{ Br}$                                                                                                                                      | $\text{jx}(\text{ip\_CH2Br2})$                                                      | Sander et al. (2014)       |
| J7402  | TrGJBr    | $\text{CHBr}_3 + h\nu \rightarrow \text{LCARBON} + 3 \text{ Br}$                                                                                                                                               | $\text{jx}(\text{ip\_CHBr3})$                                                       | Sander et al. (2014)       |
| J7500  | StGJBrF   | $\text{CF}_3\text{Br} + h\nu \rightarrow \text{LCARBON} + 3 \text{ LFLUORINE} + \text{Br}$                                                                                                                     | $\text{jx}(\text{ip\_CF3Br})$                                                       | Sander et al. (2014)       |

Table S2: Photolysis reactions (... continued)

| #            | labels     | reaction                                                                                                 | rate coefficient                                | reference             |
|--------------|------------|----------------------------------------------------------------------------------------------------------|-------------------------------------------------|-----------------------|
| J7600        | StTrGJBrCl | $\text{BrCl} + h\nu \rightarrow \text{Br} + \text{Cl}$                                                   | $\text{jx}(\text{ip\_BrCl})$                    | Sander et al. (2014)  |
| J7601        | StGJBrClF  | $\text{CF}_2\text{ClBr} + h\nu \rightarrow \text{LCARBON} + 2 \text{ LFLUORINE} + \text{Br} + \text{Cl}$ | $\text{jx}(\text{ip\_CF2ClBr})$                 | Sander et al. (2014)  |
| J7602        | TrGJBrCl   | $\text{CH}_2\text{ClBr} + h\nu \rightarrow \text{LCARBON} + \text{Br} + \text{Cl}$                       | $\text{jx}(\text{ip\_CH2ClBr})$                 | Sander et al. (2014)  |
| J7603        | TrGJBrCl   | $\text{CHCl}_2\text{Br} + h\nu \rightarrow \text{LCARBON} + \text{Br} + 2 \text{ Cl}$                    | $\text{jx}(\text{ip\_CHCl2Br})$                 | Sander et al. (2014)  |
| J7604        | TrGJBrCl   | $\text{CHClBr}_2 + h\nu \rightarrow \text{LCARBON} + 2 \text{ Br} + \text{Cl}$                           | $\text{jx}(\text{ip\_CHClBr2})$                 | Sander et al. (2014)  |
| J8401        | StTrGJI    | $\text{CH}_3\text{I} + h\nu \rightarrow \text{CH}_3\text{O}_2$                                           | $\text{JX}(\text{ip\_CH3I})$                    | Sander et al. (2014)  |
| J6500dc01    | StGJClF    | $\text{CHF}_2\text{Cl} + h\nu \rightarrow \text{Cl} + \text{LCARBON} + 2 \text{ LFLUORINE}$              | $\text{jx}(\text{ip\_CHF2Cl})$                  | Sander et al. (2011)* |
| J6500dc02    | StGJCClF   | $\text{CF}_2\text{ClCFCl}_2 + h\nu \rightarrow 3 \text{ Cl} + 2 \text{ LCARBON}$                         | $\text{jx}(\text{ip\_CF2ClCFC12})$              | Sander et al. (2011)  |
| J6400dc01    | StGJCl     | $\text{CH}_2\text{Cl}_2 + h\nu \rightarrow 2 \text{ Cl} + \text{LCARBON}$                                | $\text{jx}(\text{ip\_CH2Cl2})$                  | Sander et al. (2011)  |
| J6500dc03    | StGJCClF   | $\text{CH}_3\text{CFCl}_2 + h\nu \rightarrow 2 \text{ Cl} + 2 \text{ LCARBON}$                           | $\text{jx}(\text{ip\_CH3CFC12})$                | Sander et al. (2011)  |
| J6500dc04    | StGJCClF   | $\text{CF}_2\text{ClCF}_2\text{Cl} + h\nu \rightarrow 2 \text{ Cl} + 2 \text{ LCARBON}$                  | $\text{jx}(\text{ip\_CF2ClCF2Cl})$              | Sander et al. (2011)  |
| J6400dc02    | StGJCl     | $\text{CHCl}_3 + h\nu \rightarrow 3 \text{ Cl} + \text{LCARBON}$                                         | $\text{jx}(\text{ip\_CHCl3})$                   | Sander et al. (2011)  |
| J6500dc05    | StGJCClF   | $\text{CF}_3\text{CF}_2\text{Cl} + h\nu \rightarrow \text{Cl} + 2 \text{ LCARBON}$                       | $\text{jx}(\text{ip\_CF3CF2Cl})$                | Sander et al. (2011)  |
| J6500dc06    | StG        | $\text{CH}_2\text{F}_2 + \text{Cl} \rightarrow \text{HCl} + \text{LCARBON}$                              | $4.9\text{e-}12*\text{EXP}(-1500./\text{temp})$ | Sander et al. (2011)  |
| J9000        | TrStGJS    | $\text{OCS} + h\nu \rightarrow \text{CO} + \text{S}$                                                     | $\text{JX}(\text{ip\_OCS})$                     | ████                  |
| J9001        | TrStGJS    | $\text{SO}_2 + h\nu \rightarrow \text{SO} + \text{O}(^3\text{P})$                                        | $60.*\text{JX}(\text{ip\_OCS})$                 | ████                  |
| J9002        | TrStGJS    | $\text{SO}_3 + h\nu \rightarrow \text{SO}_2 + \text{O}(^3\text{P})$                                      | $\text{JX}(\text{ip\_S03})$                     | ████                  |
| J9003        | TrStGJS    | $\text{H}_2\text{SO}_4 + h\nu \rightarrow \text{SO}_3 + \text{H}_2\text{O}$                              | $\text{JX}(\text{ip\_H2S04})$                   | ████                  |
| PH (aqueous) |            |                                                                                                          |                                                 |                       |

## General notes

*j*-values are calculated with an external module (e.g., JVAL) and then supplied to the MECCA chemistry.

Values that originate from the Master Chemical Mechanism (MCM) by Rickard and Pascoe (2009) are translated according in the following way:

$\text{j}(11) \rightarrow \text{jx}(\text{ip\_COH2})$   
 $\text{j}(12) \rightarrow \text{jx}(\text{ip\_CHOH})$   
 $\text{j}(15) \rightarrow \text{jx}(\text{ip\_HOCH2CHO})$   
 $\text{j}(18) \rightarrow \text{jx}(\text{ip\_MACR})$   
 $\text{j}(22) \rightarrow \text{jx}(\text{ip\_ACETOL})$   
 $\text{j}(23)+\text{j}(24) \rightarrow \text{jx}(\text{ip\_MVK})$   
 $\text{j}(31)+\text{j}(32)+\text{j}(33) \rightarrow \text{jx}(\text{ip\_GLYOX})$   
 $\text{j}(34) \rightarrow \text{jx}(\text{ip\_MGLYOX})$

$\text{j}(41) \rightarrow \text{jx}(\text{ip\_CH300H})$   
 $\text{j}(53) \rightarrow \text{j}(\text{isopropyl nitrate})$   
 $\text{j}(54) \rightarrow \text{j}(\text{isopropyl nitrate})$   
 $\text{j}(55) \rightarrow \text{j}(\text{isopropyl nitrate})$   
 $\text{j}(56)+\text{j}(57) \rightarrow \text{jx}(\text{ip\_NOA})$

## Specific notes

**J4302:** It is assumed that  $\text{J}(\text{CH}_3\text{COCH}_2\text{OH})$  is 0.074 times that of J4101b.  
**J4304:** It is assumed that  $\text{J}(\text{CH}_3\text{COCH}_2\text{O}_2\text{H})$  is the same as  $\text{J}(\text{CH}_3\text{OOH})$ .  
**J4306:** Following von Kuhlmann et al. (2003), we use  $\text{J}(\text{iC}_3\text{H}_7\text{ONO}_2) = 3.7*\text{jx}(\text{ip\_PAN})$ .

**J4402:** It is assumed that  $\text{J}(\text{MVKOOH})$  is the same as  $\text{J}(\text{CH}_3\text{OOH})$ .

**J4405:** It is assumed that  $\text{J}(\text{BIACET})$  is 2.15 times larger than  $\text{J}(\text{MGLYOX})$ , consistent with the photolysis rate coefficients used in the MCM (Rickard and Pascoe, 2009).

**J4407:** It is assumed that  $\text{J}(\text{MPAN})$  is the same as  $\text{J}(\text{PAN})$ .

**J4500:** It is assumed that  $\text{J}(\text{ISOOH})$  is the same as  $\text{J}(\text{CH}_3\text{OOH})$ .

**J7301:** The quantum yields are recommended by Burkholder et al. (2015) for  $\lambda > 300\text{nm}$  and used here for the entire spectrum.

**J6500dc01:** OKAY!

Table S3: Reversible (Henry’s law) equilibria and irreversible (“heterogenous”) uptake

| # | labels | reaction | rate coefficient | reference |
|---|--------|----------|------------------|-----------|
|---|--------|----------|------------------|-----------|

## General notes

The forward (`k_exf`) and backward (`k_exb`) rate coefficients are calculated in subroutine `mecca_aero_calc_k_ex` in the file `messy_mecca_aero.f90` using accommodation coefficients and Henry’s law constants from chemprop (see `chemprop.pdf`).

For uptake of X ( $X = \text{N}_2\text{O}_5$ ,  $\text{ClNO}_3$ , or  $\text{BrNO}_3$ ) and

subsequent reaction with  $\text{H}_2\text{O}$ ,  $\text{Cl}^-$ , and  $\text{Br}^-$  in H3201, H6300, H6301, H6302, H7300, H7301, H7302, H7601, and H7602, we define:

$$k_{\text{exf}}(\text{X}) = \frac{k_{\text{mt}}(\text{X}) \times \text{LWC}}{[\text{H}_2\text{O}] + 5 \times 10^2 [\text{Cl}^-] + 3 \times 10^5 [\text{Br}^-]}$$

Here,  $k_{\text{mt}}$  = mass transfer coefficient, and LWC = liquid water content of the aerosol. The total uptake rate of X is only determined by  $k_{\text{mt}}$ . The factors only affect

the branching between hydrolysis and the halide reactions. The factor  $5 \times 10^2$  was chosen such that the chloride reaction dominates over hydrolysis at about  $[\text{Cl}^-] > 0.1 \text{ M}$  (see Fig. 3 in Behnke et al. (1997)), i.e. when the ratio  $[\text{H}_2\text{O}]/[\text{Cl}^-]$  is less than  $5 \times 10^2$ . The ratio  $5 \times 10^2 / 3 \times 10^5$  was chosen such that the reactions with chloride and bromide are roughly equal for sea water composition (Behnke et al., 1994). These ratios were measured for uptake of  $\text{N}_2\text{O}_5$ . Here, they are also used for  $\text{ClNO}_3$  and  $\text{BrNO}_3$ .

Table S4: Heterogeneous reactions

| #      | labels       | reaction                                                                                | rate coefficient                    | reference          |
|--------|--------------|-----------------------------------------------------------------------------------------|-------------------------------------|--------------------|
| HET200 | StHetN       | $\text{N}_2\text{O}_5 + \text{H}_2\text{O} \rightarrow 2 \text{HNO}_3$                  | <code>khet_St(ihs_N205_H20)</code>  | see general notes* |
| HET201 | TrHetN       | $\text{N}_2\text{O}_5 \rightarrow 2 \text{NO}_3^-(\text{cs}) + 2 \text{H}^+(\text{cs})$ | <code>khet_Tr(iht_N205)</code>      | see general notes* |
| HET410 | StHetCl      | $\text{HOCl} + \text{HCl} \rightarrow \text{Cl}_2 + \text{H}_2\text{O}$                 | <code>khet_St(ihs_HOCl_HCl)</code>  | see general notes* |
| HET420 | StHetClN     | $\text{ClNO}_3 + \text{HCl} \rightarrow \text{Cl}_2 + \text{HNO}_3$                     | <code>khet_St(ihs_ClNO3_HCl)</code> | see general notes* |
| HET421 | StHetClN     | $\text{ClNO}_3 + \text{H}_2\text{O} \rightarrow \text{HOCl} + \text{HNO}_3$             | <code>khet_St(ihs_ClNO3_H20)</code> | see general notes* |
| HET422 | StHetClN     | $\text{N}_2\text{O}_5 + \text{HCl} \rightarrow \text{ClNO}_2 + \text{HNO}_3$            | <code>khet_St(ihs_N205_HCl)</code>  | see general notes* |
| HET510 | TrStHetBr    | $\text{HOBr} + \text{HBr} \rightarrow \text{Br}_2 + \text{H}_2\text{O}$                 | <code>khet_St(ihs_HOBr_HBr)</code>  | see general notes* |
| HET520 | TrStHetBrN   | $\text{BrNO}_3 + \text{H}_2\text{O} \rightarrow \text{HOBr} + \text{HNO}_3$             | <code>khet_St(ihs_BrNO3_H20)</code> | see general notes* |
| HET540 | TrStHetBrClN | $\text{ClNO}_3 + \text{HBr} \rightarrow \text{BrCl} + \text{HNO}_3$                     | <code>khet_St(ihs_ClNO3_HBr)</code> | see general notes* |
| HET541 | TrStHetBrClN | $\text{BrNO}_3 + \text{HCl} \rightarrow \text{BrCl} + \text{HNO}_3$                     | <code>khet_St(ihs_BrNO3_HCl)</code> | see general notes* |
| HET542 | TrStHetBrCl  | $\text{HOCl} + \text{HBr} \rightarrow \text{BrCl} + \text{H}_2\text{O}$                 | <code>khet_St(ihs_HOCl_HBr)</code>  | see general notes* |
| HET543 | TrStHetBrCl  | $\text{HOBr} + \text{HCl} \rightarrow \text{BrCl} + \text{H}_2\text{O}$                 | <code>khet_St(ihs_HOBr_HCl)</code>  | see general notes* |

## General notes

Heterogeneous reaction rates are calculated with an external module (e.g., MECCA\_KHET) and then supplied to the MECCA chemistry (see [www.messy-interface.org](http://www.messy-interface.org) for details)

Table S5: Acid-base and other equilibria

| # | labels | reaction | $K_0[M^{m-n}]$ | $-\Delta H/R[K]$ | reference |
|---|--------|----------|----------------|------------------|-----------|
|---|--------|----------|----------------|------------------|-----------|

**Specific notes**

Table S6: Aqueous phase reactions

| # | labels | reaction | $k_0$ [ $M^{1-n}s^{-1}$ ] | $-E_a/R[K]$ | reference |
|---|--------|----------|---------------------------|-------------|-----------|
|---|--------|----------|---------------------------|-------------|-----------|

**Specific notes**

## References

- Anderson, L. C. and Fahey, D. W.: Studies with  $\text{ClONO}_2$ : Thermal dissociation rate and catalytic conversion to NO using an NO/ $\text{O}_3$  chemiluminescence detector, *J. Phys. Chem.*, 94, 644–652, doi:10.1021/J100365A027, 1990.
- Aranda, A., Le Bras, G., La Verdet, G., and Poulet, G.: The  $\text{BrO} + \text{CH}_3\text{O}_2$  reaction: Kinetics and role in the atmospheric ozone budget, *Geophys. Res. Lett.*, 24, 2745–2748, doi:10.1029/97GL02686, 1997.
- Atkinson, R.: Gas-phase tropospheric chemistry of volatile organic compounds: 1. Alkanes and alkenes, *J. Phys. Chem. Ref. Data*, 26, 215–290, doi:10.1063/1.556012, 1997.
- Atkinson, R.: Kinetics of the gas-phase reactions of OH radicals with alkanes and cycloalkanes, *Atmos. Chem. Phys.*, 3, 2233–2307, doi:10.5194/ACP-3-2233-2003, 2003.
- Atkinson, R., Baulch, D. L., Cox, R. A., Crowley, J. N., Hampson, R. F., Hynes, R. G., Jenkin, M. E., Rossi, M. J., and Troe, J.: Evaluated kinetic and photochemical data for atmospheric chemistry: Volume I – gas phase reactions of  $\text{O}_x$ ,  $\text{HO}_x$ ,  $\text{NO}_x$  and  $\text{SO}_x$  species, *Atmos. Chem. Phys.*, 4, 1461–1738, doi:10.5194/ACP-4-1461-2004, 2004.
- Atkinson, R., Baulch, D. L., Cox, R. A., Crowley, J. N., Hampson, R. F., Hynes, R. G., Jenkin, M. E., Rossi, M. J., Troe, J., and IUPAC Subcommittee: Evaluated kinetic and photochemical data for atmospheric chemistry: Volume II – gas phase reactions of organic species, *Atmos. Chem. Phys.*, 6, 3625–4055, doi:10.5194/ACP-6-3625-2006, 2006.
- Atkinson, R., Baulch, D. L., Cox, R. A., Crowley, J. N., Hampson, R. F., Hynes, R. G., Jenkin, M. E., Rossi, M. J., and Troe, J.: Evaluated kinetic and photochemical data for atmospheric chemistry: Volume III – gas phase reactions of inorganic halogens, *Atmos. Chem. Phys.*, 7, 981–1191, doi:10.5194/ACP-7-981-2007, 2007.
- Barone, S. B., Turnipseed, A. A., and Ravishankara, A. R.: Role of adducts in the atmospheric oxidation of dimethyl sulfide, *Faraday Discuss.*, 100, 39–54, doi:10.1039/FD9950000039, 1995.
- Bedjanian, Y., Laverdet, G., and Le Bras, G.: Low-pressure study of the reaction of Cl atoms with isoprene, *J. Phys. Chem. A*, 102, 953–959, doi:10.1021/JP973336C, 1998.
- Behnke, W., Scheer, V., and Zetzsch, C.: Production of  $\text{BrNO}_2$ ,  $\text{Br}_2$  and  $\text{ClNO}_2$  from the reaction between sea spray aerosol and  $\text{N}_2\text{O}_5$ , *J. Aerosol Sci.*, 25, S277–S278, doi:10.1016/0021-8502(94)90369-7, 1994.
- Behnke, W., George, C., Scheer, V., and Zetzsch, C.: Production and decay of  $\text{ClNO}_2$  from the reaction of gaseous  $\text{N}_2\text{O}_5$  with NaCl solution: Bulk and aerosol experiments, *J. Geophys. Res.*, 102D, 3795–3804, doi:10.1029/96JD03057, 1997.
- Boyd, A. A., Flaud, P.-M., Daugey, N., and Lesclaux, R.: Rate constants for  $\text{RO}_2 + \text{HO}_2$  reactions measured under a large excess of  $\text{HO}_2$ , *J. Phys. Chem. A*, 107, 818–821, doi:10.1021/JP026581R, 2003.
- Burkholder, J. B., Sander, S. P., Abbatt, J., Barker, J. R., Huie, R. E., Kolb, C. E., Kurylo, M. J., Orkin, V. L., Wilmouth, D. M., and Wine, P. H.: Chemical Kinetics and Photochemical Data for Use in Atmospheric Studies, Evaluation No. 18, JPL Publication 15-10, Jet Propulsion Laboratory, Pasadena, <http://jpldataeval.jpl.nasa.gov>, 2015.
- Canosa-Mas, C. E., King, M. D., Lopez, R., Percival, C. J., Wayne, R. P., Shallcross, D. E., Pyle, J. A., and Daele, V.: Is the reaction between  $\text{CH}_3(\text{O})\text{O}_2$  and  $\text{NO}_3$  important in the night-time troposphere?, *J. Chem. Soc. Faraday Trans.*, 92, 2211–2222, doi:10.1039/FT9969202211, 1996.
- Clyne, M. A. A. and Cruse, H. W.: Atomic resonance fluorescence spectrometry for the rate constants of rapid bimolecular reactions. Part 2. Reactions  $\text{Cl} + \text{BrCl}$ ,  $\text{Cl} + \text{Br}_2$ ,  $\text{Cl} + \text{ICl}$ ,  $\text{Br} + \text{IBr}$ ,  $\text{Br} + \text{ICl}$ , *J. Chem. Soc. Faraday Trans. 2*, 68, 1377–1387, doi:10.1039/F29726801377, 1972.
- Dillon, T. J., Horowitz, A., Hölscher, D., Crowley, J. N., Vereecken, L., and Peeters, J.: Reaction of HO with hydroxyacetone ( $\text{HOCH}_2\text{C}(\text{O})\text{CH}_3$ ): rate coefficients (233–363 K) and mechanism, *Phys. Chem. Chem. Phys.*, 8, 236–246, doi:10.1039/B513056E, 2006.
- Dolson, D. A. and Leone, S. R.: A reinvestigation of the laser-initiated chlorine/hydrogen bromide chain reaction: absolute rate constants and the  $v = 2/v = 1$  ratio from chlorine atom + hydrogen bromide  $\rightarrow$  hydrogen chloride( $v$ ) + bromine atom, *J. Phys. Chem.*, 91, 3543–3550, doi:10.1021/J100297A016, 1987.
- Dulitz, K., Amedro, D., Dillon, T. J., Pozzer, A., and Crowley, J. N.: Temperature (208–318 K) and pressure (18–696 Torr) dependent rate coefficients for the reaction between OH and  $\text{HNO}_3$ , *Atmos. Chem. Phys.*, 18, 2381–2394, doi:10.5194/acp-18-2381-2018, 2018.
- Finkbeiner, M., Crowley, J. N., Horie, O., Müller, R., Moortgat, G. K., and Crutzen, P. J.: Reaction between  $\text{HO}_2$  and  $\text{ClO}$ : Product formation between 210 and 300 K, *J. Phys. Chem.*, 99, 16 264–16 275, doi:10.1021/J100044A011, 1995.

- Hynes, A. J. and Wine, P. H.: The atmospheric chemistry of dimethylsulfoxide (DMSO) kinetics and mechanism of the OH + DMSO reaction, *J. Atmos. Chem.*, 24, 23–37, doi:10.1007/BF00053821, 1996.
- Ingham, T., Bauer, D., Sander, R., Crutzen, P. J., and Crowley, J. N.: Kinetics and products of the reactions BrO + DMS and Br + DMS at 298 K, *J. Phys. Chem. A*, 103, 7199–7209, doi:10.1021/JP9905979, 1999.
- Jefferson, A., Nicovich, J. M., and Wine, P. H.: Temperature-dependent kinetics studies of the reactions  $\text{Br}(^2\text{P}_{3/2}) + \text{CH}_3\text{SCH}_3 \leftrightarrow \text{CH}_3\text{SCH}_2 + \text{HBr}$ . Heat of formation of the  $\text{CH}_3\text{SCH}_2$  radical, *J. Phys. Chem.*, 98, 7128–7135, doi:10.1021/J100080A006, 1994.
- Jenkin, M., Saunders, S. M., and Pilling, M. J.: The tropospheric degradation of volatile organic compounds: A protocol for mechanism development, *Atmos. Environ.*, 31, 81–104, doi:10.1016/S1352-2310(96)00105-7, 1997.
- Kirchner, F. and Stockwell, W. R.: Effect of peroxy radical reactions on the predicted concentrations of ozone, nitrogenous compounds, and radicals, *J. Geophys. Res.*, 101D, 21 007–21 022, doi:10.1029/96JD01519, 1996.
- Kohlmann, J.-P. and Poppe, D.: The tropospheric gas-phase degradation of  $\text{NH}_3$  and its impact on the formation of  $\text{N}_2\text{O}$  and  $\text{NO}_x$ , *J. Atmos. Chem.*, 32, 397–415, doi:10.1023/A:1006162910279, 1999.
- Kondo, O. and Benson, S. W.: Kinetics and equilibria in the system  $\text{Br} + \text{CH}_3\text{OOH} \rightleftharpoons \text{HBr} + \text{CH}_3\text{OO}$ . An upper limit for the heat of formation of the methylperoxy radical, *J. Phys. Chem.*, 88, 6675–6680, doi:10.1021/J150670A034, 1984.
- Manion, J. A., Huie, R. E., Levin, R. D., Burgess, Jr., D. R., Orkin, V. L., Tsang, W., McGivern, W. S., Hudgens, J. W., Knyazev, V. D., Atkinson, D. B., Chai, E., Tereza, A. M., Lin, C.-Y., Allison, T. C., Mallard, W. G., Westley, F., Herron, J. T., Hampson, R. F., and Frizzell, D. H.: NIST Chemical Kinetics Database, NIST Standard Reference Database 17 (Web Version), <http://kinetics.nist.gov>, 2015.
- McCabe, D. C., Gierczak, T., Talukdar, R. K., and Ravishankara, A. R.: Kinetics of the reaction OH + CO under atmospheric conditions, *Geophys. Res. Lett.*, 28, 3135–3138, doi:10.1029/2000GL012719, 2001.
- Müller, J.-F. and Brasseur, G.: IMAGES: A three-dimensional chemical transport model of the global troposphere, *J. Geophys. Res.*, 100D, 16 445–16 490, doi:10.1029/94JD03254, 1995.
- Orlando, J. J. and Tyndall, G. S.: Rate coefficients for the thermal decomposition of  $\text{BrONO}_2$  and the heat of formation of  $\text{BrONO}_2$ , *J. Phys. Chem.*, 100, 19 398–19 405, doi:10.1021/JP9620274, 1996.
- Orlando, J. J., Tyndall, G. S., Bertman, S. B., Chen, W., and Burkholder, J. B.: Rate coefficient for the reaction of OH with  $\text{CH}_2=\text{C}(\text{CH}_3)\text{C}(\text{O})\text{OONO}_2$  (MPAN), *Atmos. Environ.*, 36, 1895–1900, doi:10.1016/S1352-2310(02)00090-0, 2002.
- Pöschl, U., von Kuhlmann, R., Poisson, N., and Crutzen, P. J.: Development and intercomparison of condensed isoprene oxidation mechanisms for global atmospheric modeling, *J. Atmos. Chem.*, 37, 29–52, doi:10.1023/A:1006391009798, 2000.
- Rickard, A. and Pascoe, S.: The Master Chemical Mechanism (MCM), <http://mcm.leeds.ac.uk>, 2009.
- Roelofs, G.-J. and Lelieveld, J.: Model study of the influence of cross-tropopause  $\text{O}_3$  transports of tropospheric  $\text{O}_3$  levels, *Tellus*, 49B, 38–55, doi:10.3402/TELLUSB.V49I1.15949, 1997.
- Sander, R., Jöckel, P., Kirner, O., Kunert, A. T., Landgraf, J., and Pozzer, A.: The photolysis module JVAL-14, compatible with the MESSy standard, and the JVal PreProcessor (JVPP), *Geosci. Model Dev.*, 7, 2653–2662, doi:10.5194/GMD-7-2653-2014, 2014.
- Sander, R., Baumgaertner, A., Cabrera-Perez, D., Frank, F., Gromov, S., Grooß, J.-U., Harder, H., Huijnen, V., Jöckel, P., Karydis, V. A., Niemeyer, K. E., Pozzer, A., Riede, H., Schultz, M. G., Taraborrelli, D., and Tauer, S.: The community atmospheric chemistry box model CAABA/MECCA-4.0, *Geosci. Model Dev.*, 12, 1365–1385, doi:10.5194/gmd-12-1365-2019, 2019.
- Sander, S. P., Finlayson-Pitts, B. J., Friedl, R. R., Golden, D. M., Huie, R. E., Kolb, C. E., Kurylo, M. J., Molina, M. J., Moortgat, G. K., Orkin, V. L., and Ravishankara, A. R.: Chemical Kinetics and Photochemical Data for Use in Atmospheric Studies, Evaluation Number 14, JPL Publication 02-25, Jet Propulsion Laboratory, Pasadena, CA, 2003.
- Sander, S. P., Friedl, R. R., Golden, D. M., Kurylo, M. J., Moortgat, G. K., Keller-Rudek, H., Wine, P. H., Ravishankara, A. R., Kolb, C. E., Molina, M. J., Finlayson-Pitts, B. J., Huie, R. E., and Orkin, V. L.: Chemical Kinetics and Photochemical Data for Use in Atmospheric Studies, Evaluation Number 15, JPL Publication 06-2, Jet Propulsion Laboratory, Pasadena, CA, <http://jpldataeval.jpl.nasa.gov>, 2006.
- Sander, S. P., Abbatt, J., Barker, J. R., Burkholder, J. B., Friedl, R. R., Golden, D. M., Huie, R. E., Kolb,

- C. E., Kurylo, M. J., Moortgat, G. K., Orkin, V. L., and Wine, P. H.: Chemical Kinetics and Photochemical Data for Use in Atmospheric Studies, Evaluation No. 17, JPL Publication 10-6, Jet Propulsion Laboratory, Pasadena, <http://jpldataeval.jpl.nasa.gov>, 2011.
- Sivakumaran, V., Hölscher, D., Dillon, T. J., and Crowley, J. N.: Reaction between OH and HCHO: temperature dependent rate coefficients (202-399 K) and product pathways (298 K), *Phys. Chem. Chem. Phys.*, 5, 4821–4827, doi:10.1039/B306859E, 2003.
- Strekowski, R. S., Nicovich, J. M., and Wine, P. H.: Kinetic and mechanistic study of the Reactions of O(<sup>1</sup>D<sub>2</sub>) with HCN and CH<sub>3</sub>CN, *Chem. Phys. Chem.*, 11, 3942–3955, doi:10.1002/cphc.201000550, 2010.
- Tyndall, G. S., Staffelbach, T. A., Orlando, J. J., and Calvert, J. G.: Rate coefficients for the reactions of OH radicals with methylglyoxal and acetaldehyde, *Int. J. Chem. Kinet.*, 27, 1009–1020, doi:10.1002/KIN.550271006, 1995.
- Tyndall, G. S., Orlando, J. J., Wallington, T. J., Sehested, J., and Nielsen, O. J.: Kinetics of the reactions of acetonitrile with chlorine and fluorine atoms, *J. Phys. Chem.*, 100, 660–668, doi:10.1021/jp9521417, 1996.
- Tyndall, G. S., Cox, R. A., Granier, C., Lesclaux, R., Moortgat, G. K., Pilling, M. J., Ravishankara, A. R., and Wallington, T. J.: The atmospheric chemistry of small organic peroxy radicals, *J. Geophys. Res.*, 106D, 12 157–12 182, doi:10.1029/2000JD900746, 2001a.
- Tyndall, G. S., Orlando, J. J., Wallington, T. J., and Hurley, M. D.: Products of the chlorine-atom- and hydroxyl-radical-initiated oxidation of CH<sub>3</sub>CN, *J. Phys. Chem. A*, 105, 5380–5384, doi:10.1021/jp004318p, 2001b.
- von Kuhlmann, R.: Tropospheric photochemistry of ozone, its precursors and the hydroxyl radical: A 3D-modeling study considering non-methane hydrocarbons, Ph.D. thesis, Johannes Gutenberg-Universität, Mainz, Germany, 2001.
- von Kuhlmann, R., Lawrence, M. G., Crutzen, P. J., and Rasch, P. J.: A model for studies of tropospheric ozone and nonmethane hydrocarbons: Model description and ozone results, *J. Geophys. Res.*, 108D, 4294, doi:10.1029/2002JD002893, 2003.
- Wallington, T. J., Ammann, M., Cox, R. A., Crowley, J. N., Herrmann, H., Jenkin, M. E., McNeill, V., Mellouki, A., Rossi, M. J., and Troe, J.: IUPAC Task group on atmospheric chemical kinetic data evaluation: Evaluated kinetic data, <http://iupac.pole-ether.fr>, 2018.
- Yin, F., Grosjean, D., and Seinfeld, J. H.: Photooxidation of dimethyl sulfide and dimethyl disulfide. I: Mechanism development, *J. Atmos. Chem.*, 11, 309–364, doi:10.1007/BF00053780, 1990.
